# Supplementary material for: A Systematic Review and Network Meta-Analysis about the Efficacy and Safety of Tripterygium wilfordii Hook F in Rheumatoid Arthritis
Source: Hindawi journal article supplement (doi:10.1155/2022/3181427), 2022-05-10
Supplement: f1 [file 3181427.f1.zip]

# Treatment Effect

# Mean with 95%CI and 95%PrI

|            |                         |
|------------|-------------------------|
| T vs M     | 2.49 (0.74,8.42) (..)   |
| M+T vs M   | 2.86 (0.80,10.27) (..)  |
| L vs M     | 1.87 (0.77,4.55) (..)   |
| L+T vs M   | 6.90 (1.16,40.94) (..)  |
| S vs M     | 0.66 (0.19,2.37) (..)   |
| M+S vs M   | 1.61 (0.16,15.84) (..)  |
| C vs M     | 2.22 (0.40,12.28) (..)  |
| L+C vs M   | 9.29 (1.67,51.69) (..)  |
| F vs M     | 1.41 (0.20,10.25) (..)  |
| P vs M     | 0.59 (0.13,2.66) (..)   |
| M+T vs T   | 1.15 (0.32,4.06) (..)   |
| L vs T     | 0.75 (0.18,3.12) (..)   |
| L+T vs T   | 2.77 (0.34,22.61) (..)  |
| S vs T     | 0.27 (0.06,1.12) (..)   |
| M+S vs T   | 0.65 (0.05,7.77) (..)   |
| C vs T     | 0.89 (0.12,6.86) (..)   |
| L+C vs T   | 3.72 (0.48,28.83) (..)  |
| F vs T     | 0.57 (0.06,5.31) (..)   |
| P vs T     | 0.24 (0.04,1.57) (..)   |
| L vs M+T   | 0.65 (0.14,2.98) (..)   |
| L+T vs M+T | 2.41 (0.28,20.98) (..)  |
| S vs M+T   | 0.23 (0.04,1.21) (..)   |
| M+S vs M+T | 0.56 (0.04,7.34) (..)   |
| C vs M+T   | 0.78 (0.09,6.37) (..)   |
| L+C vs M+T | 3.25 (0.39,26.80) (..)  |
| F vs M+T   | 0.49 (0.05,5.01) (..)   |
| P vs M+T   | 0.21 (0.03,1.45) (..)   |
| L+T vs L   | 3.68 (0.79,17.25) (..)  |
| S vs L     | 0.35 (0.11,1.20) (..)   |
| M+S vs L   | 0.86 (0.08,9.06) (..)   |
| C vs L     | 1.19 (0.27,5.12) (..)   |
| L+C vs L   | 4.96 (1.14,21.56) (..)  |
| F vs L     | 0.76 (0.11,5.43) (..)   |
| P vs L     | 0.32 (0.07,1.37) (..)   |
| S vs L+T   | 0.10 (0.01,0.69) (..)   |
| M+S vs L+T | 0.23 (0.01,3.90) (..)   |
| C vs L+T   | 0.32 (0.04,2.70) (..)   |
| L+C vs L+T | 1.35 (0.16,11.34) (..)  |
| F vs L+T   | 0.21 (0.02,2.51) (..)   |
| P vs L+T   | 0.09 (0.01,0.72) (..)   |
| M+S vs S   | 2.43 (0.25,23.86) (..)  |
| C vs S     | 3.34 (0.50,22.39) (..)  |
| L+C vs S   | 13.99 (2.08,94.18) (..) |
| F vs S     | 2.13 (0.22,20.24) (..)  |
| P vs S     | 0.89 (0.14,5.56) (..)   |
| C vs M+S   | 1.38 (0.09,21.95) (..)  |
| L+C vs M+S | 5.75 (0.36,92.17) (..)  |
| F vs M+S   | 0.88 (0.04,17.30) (..)  |
| P vs M+S   | 0.37 (0.02,5.36) (..)   |
| L+C vs C   | 4.18 (0.97,18.08) (..)  |
| F vs C     | 0.64 (0.05,7.42) (..)   |
| P vs C     | 0.27 (0.03,2.12) (..)   |
| F vs L+C   | 0.15 (0.01,1.78) (..)   |
| P vs L+C   | 0.06 (0.01,0.51) (..)   |
| P vs F     | 0.42 (0.11,1.52) (..)   |

0

.1

1

9

90
