# Supplementary material for: A Systematic Review and Network Meta-Analysis about the Efficacy and Safety of Tripterygium wilfordii Hook F in Rheumatoid Arthritis
Source: Hindawi journal article supplement (doi:10.1155/2022/3181427), 2022-05-10
Supplement: f1 [file 3181427.f1.zip]

Blinding of participants and personnel (performance bias)

Blinding of outcome assessment (detection bias)

Incomplete outcome data (attrition bias)

Selective reporting (reporting bias)

Other bias

Random sequence generation (selection bias)

Allocation concealment (selection bias)

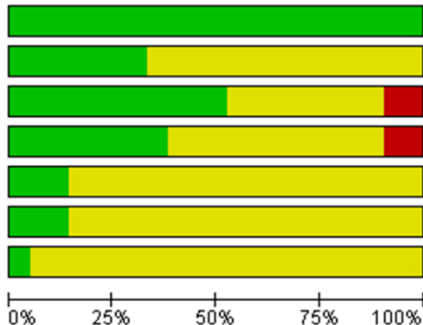

Low risk of bias

Unclear risk of bias

High risk of bias
