# Supplementary material for: A Systematic Review and Network Meta-Analysis about the Efficacy and Safety of Tripterygium wilfordii Hook F in Rheumatoid Arthritis
Source: Hindawi journal article supplement (doi:10.1155/2022/3181427), 2022-05-10
Supplement: f1 [file 3181427.f1.zip]

|                        | Random sequence generation (selection bias) | Allocation concealment (selection bias) | Blinding of participants and personnel (performance bias) | Blinding of outcome assessment (detection bias) | Incomplete outcome data (attrition bias) | Selective reporting (reporting bias) | Other bias |
|------------------------|---------------------------------------------|-----------------------------------------|-----------------------------------------------------------|-------------------------------------------------|------------------------------------------|--------------------------------------|------------|
| Bao 2003               | +                                           | +                                       | +                                                         | +                                               | ?                                        | ?                                    | ?          |
| Capell 2007            | +                                           | ?                                       | +                                                         | +                                               | ?                                        | ?                                    | ?          |
| Cohen 2001             | +                                           | +                                       | +                                                         | ?                                               | ?                                        | ?                                    | ?          |
| Dougados 1999          | +                                           | +                                       | +                                                         | +                                               | ?                                        | ?                                    | ?          |
| Emery 2000             | +                                           | +                                       | ?                                                         | +                                               | ?                                        | ?                                    | ?          |
| Gondbach-Mansky R 2009 | +                                           | ?                                       | -                                                         | -                                               | ?                                        | ?                                    | ?          |
| Haagsma 1997           | +                                           | ?                                       | +                                                         | ?                                               | ?                                        | ?                                    | ?          |
| Karanikolas 2006       | +                                           | ?                                       | ?                                                         | ?                                               | +                                        | +                                    | ?          |
| Kawai 2011             | +                                           | ?                                       | ?                                                         | ?                                               | ?                                        | ?                                    | ?          |
| Kraan MC 2000a         | +                                           | ?                                       | +                                                         | ?                                               | ?                                        | ?                                    | ?          |
| Kraan MC 2000b         | +                                           | ?                                       | +                                                         | ?                                               | ?                                        | ?                                    | ?          |
| Long 2019              | +                                           | ?                                       | ?                                                         | -                                               | ?                                        | ?                                    | ?          |
| Lv 2014                | +                                           | ?                                       | -                                                         | +                                               | +                                        | +                                    | ?          |
| Pillemer 1997          | +                                           | ?                                       | ?                                                         | ?                                               | ?                                        | ?                                    | ?          |
| Reece 2002             | +                                           | +                                       | +                                                         | +                                               | ?                                        | ?                                    | ?          |
| Scott 2001             | +                                           | +                                       | +                                                         | +                                               | ?                                        | ?                                    | ?          |
| Smolen JS 1999         | +                                           | ?                                       | +                                                         | ?                                               | ?                                        | ?                                    | ?          |
| Strand V 1999          | +                                           | +                                       | +                                                         | +                                               | +                                        | +                                    | +          |
| Wang 2013              | +                                           | ?                                       | ?                                                         | ?                                               | ?                                        | ?                                    | ?          |
| Yocum 2003             | +                                           | ?                                       | ?                                                         | ?                                               | ?                                        | ?                                    | ?          |
| Zhao 2017              | +                                           | ?                                       | ?                                                         | ?                                               | ?                                        | ?                                    | ?          |
