# Supplementary material for: A Systematic Review and Network Meta-Analysis about the Efficacy and Safety of Tripterygium wilfordii Hook F in Rheumatoid Arthritis
Source: Evid Based Complement Alternat Med. 2022 May 10;2022:3181427. doi: 10.1155/2022/3181427 (PMC9113883; doi:10.1155/2022/3181427)
Supplement: Supplementary Materials — Figure S1: PRISMA-2009-Flow-Diagram-MS-Word: PRISMA flowchart. Figure S2: Risk of bias graph. Figure S3: Risk of bias summary. Figure S4: The cumulative probability diagram. A. With ACR20 as the endpoint. B. With ACR50 as the endpoint. C. With ACR70 as the endpoint. D. The analysis of adverse events. Figure S5: Forest plots. A. With ACR20 as the endpoint. B. With ACR50 as the endpoint. C. With ACR70 as the endpoint. D. The analysis of adverse events. Figure S6: Inconsistent assessment. A. With ACR20 as the endpoint. B. With ACR50 as the endpoint. C. With ACR70 as the endpoint. D. The analysis of adverse events. Figure S7: The publication bias. A. With ACR20 as the endpoint. B. With ACR50 as the endpoint. C. With ACR70 as the endpoint. D. The analysis of adverse events. Table S1: Inverted triangle table based on ACR50. Table S2: Inverted triangle table based on ACR70. Table S3: Inverted triangle table based on adverse events. Table S4: Search strategy. [file 3181427.f1.zip]

Archive with 23 entries (23 files):
- 3181427.f1/Figure S1.PRISMA-2009-Flow-Diagram-MS-Word.doc
- 3181427.f1/Figure S2.pdf
- 3181427.f1/Figure S3.pdf
- 3181427.f1/Figure S4A.pdf
- 3181427.f1/Figure S4B.pdf
- 3181427.f1/Figure S4C.pdf
- 3181427.f1/Figure S4D.pdf
- 3181427.f1/Figure S5A.pdf
- 3181427.f1/Figure S5B.pdf
- 3181427.f1/Figure S5C.pdf
- 3181427.f1/Figure S5D.pdf
- 3181427.f1/Figure S6A.pdf
- 3181427.f1/Figure S6B.pdf
- 3181427.f1/Figure S6C.pdf
- 3181427.f1/Figure S6D.pdf
- 3181427.f1/Figure S7A.pdf
- 3181427.f1/Figure S7B.pdf
- 3181427.f1/Figure S7C.pdf
- 3181427.f1/Figure S7D.pdf
- 3181427.f1/Table S1.Inverted triangle table based on ACR50.docx
- 3181427.f1/Table S2. Inverted triangle table based on ACR70.docx
- 3181427.f1/Table S3.Inverted triangle table based on Safety.docx
- 3181427.f1/Table S4.search strategy.docx
