# Supplementary figures and images for: A Systematic Review and Network Meta-Analysis about the Efficacy and Safety of Tripterygium wilfordii Hook F in Rheumatoid Arthritis
Source: Hindawi journal article supplement (doi:10.1155/2022/3181427), 2022-05-10

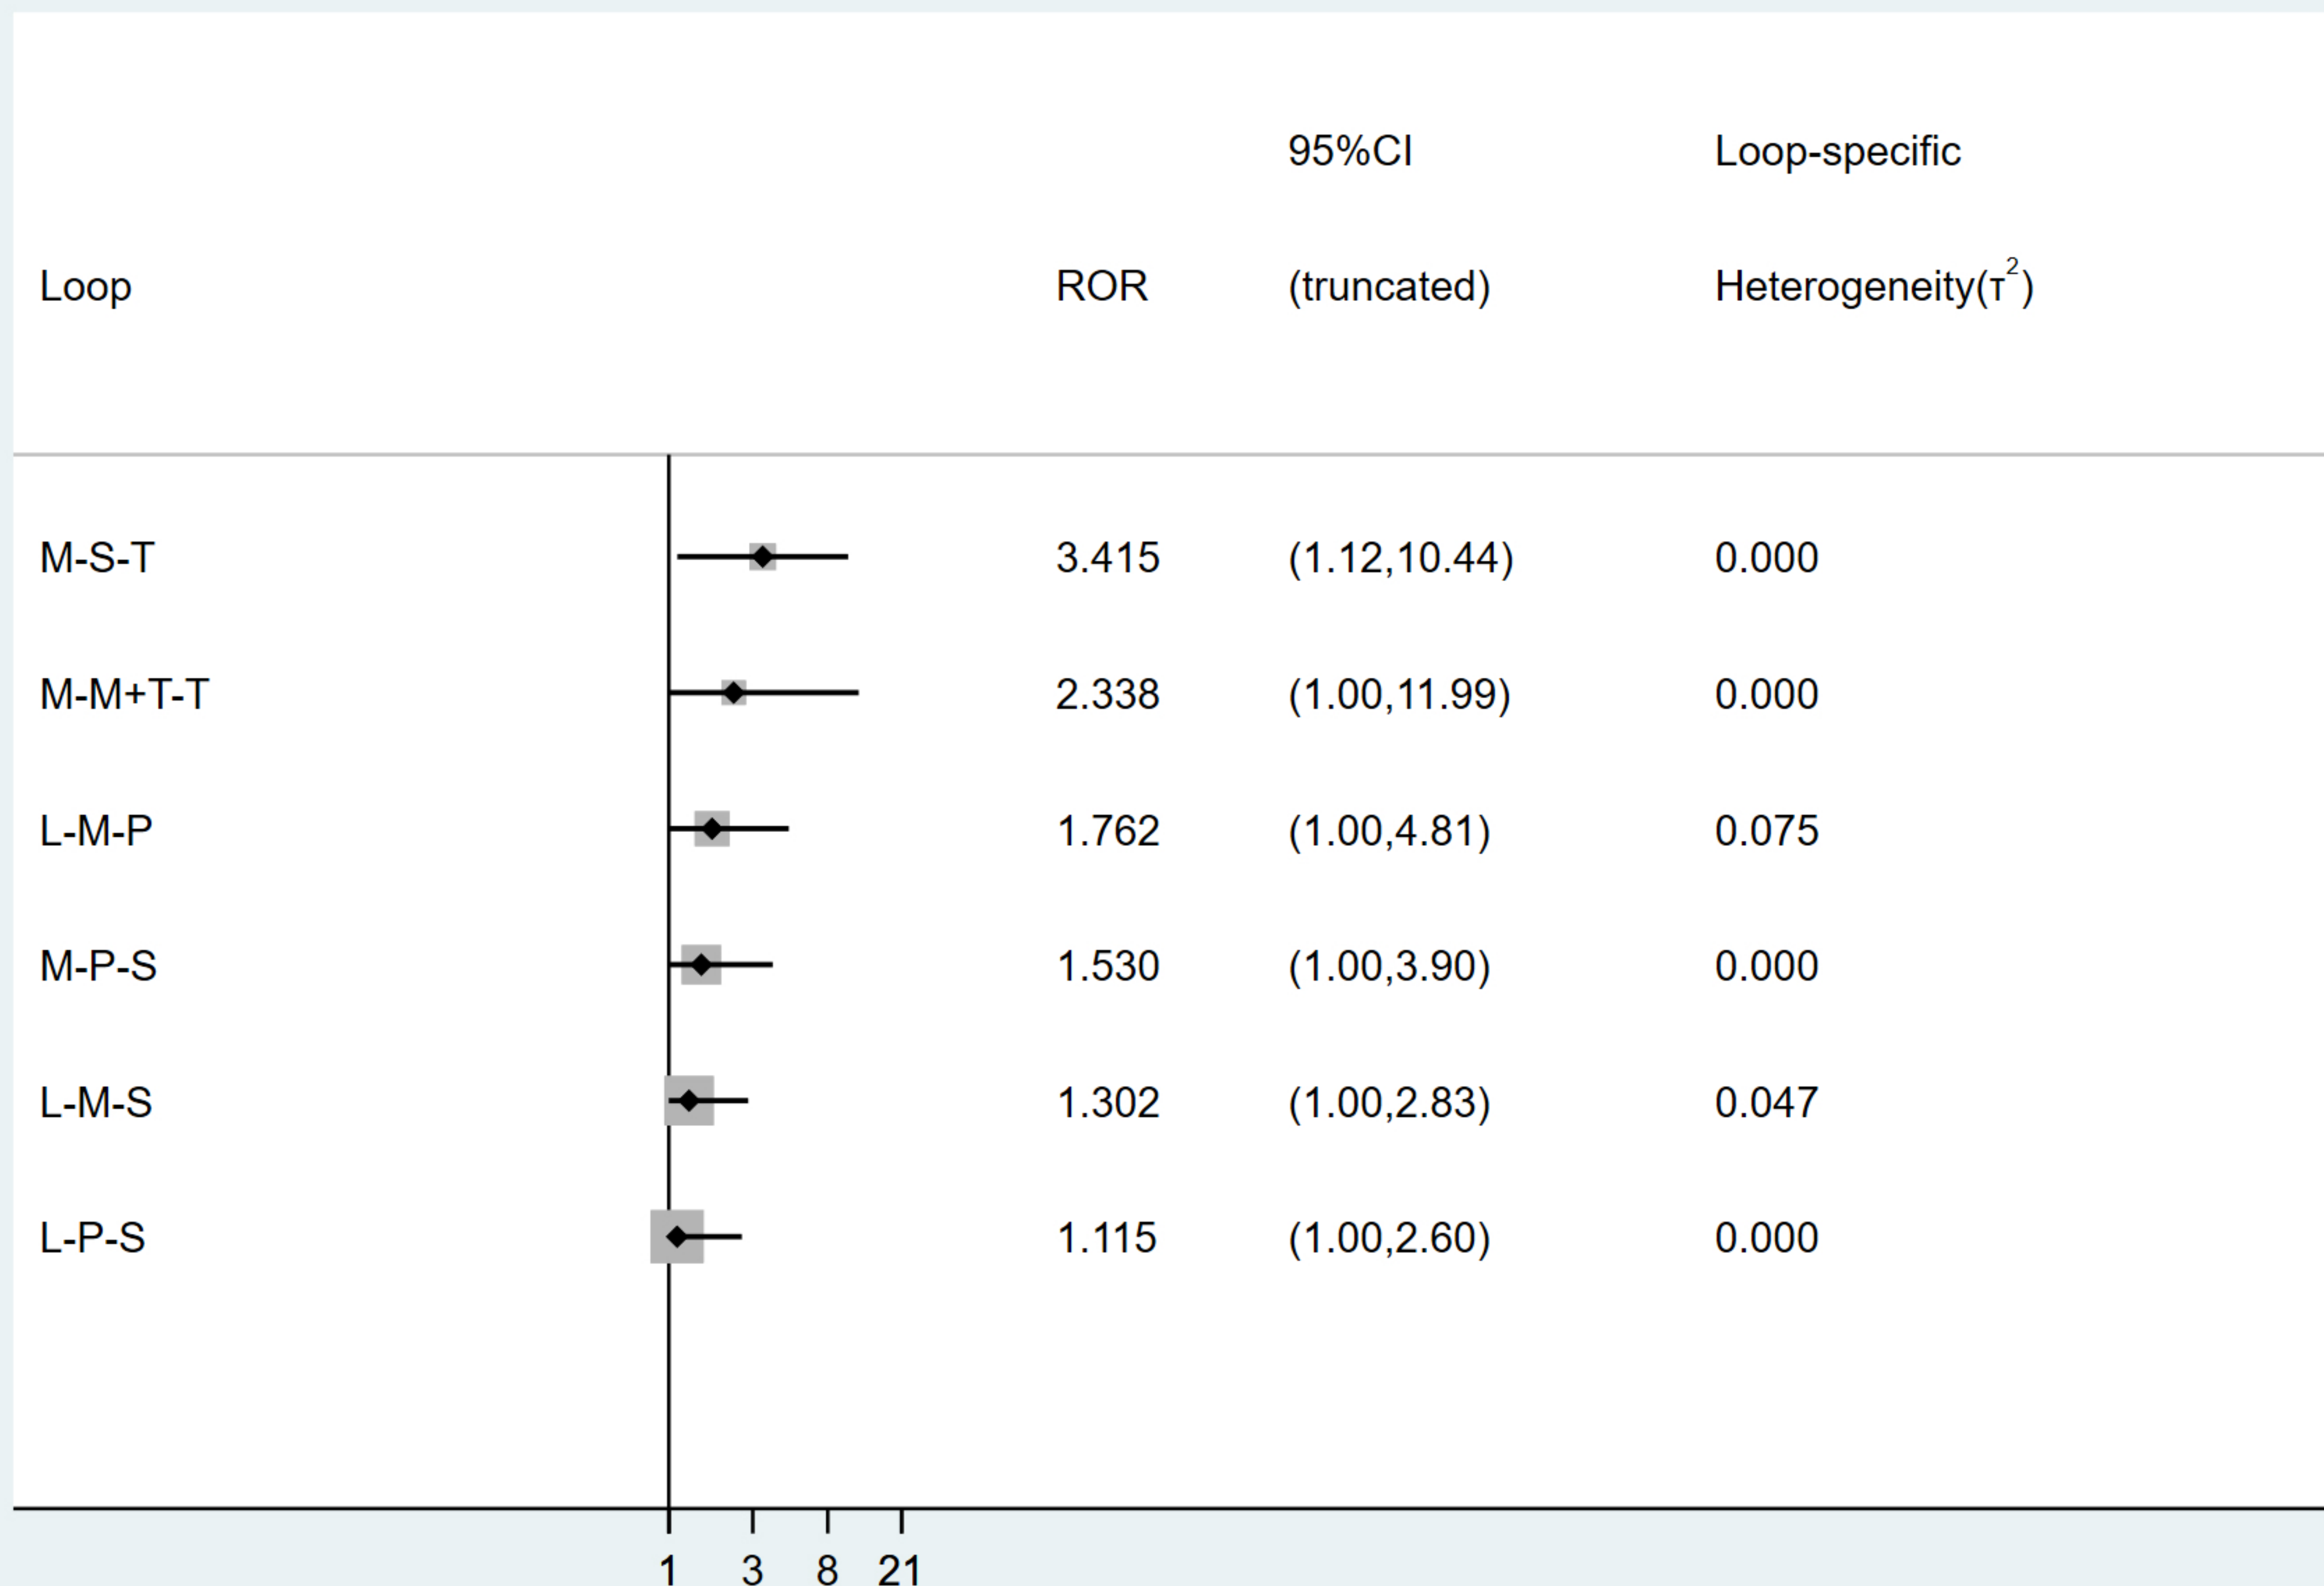

\*\*\* Loop(s) [C-L-L+C] [M-M+S-S] are formed only by multi-arm trial(s) - Consistent by definition

Supplement: f1 [file 3181427.f1.zip]

Cumulative Probabilities

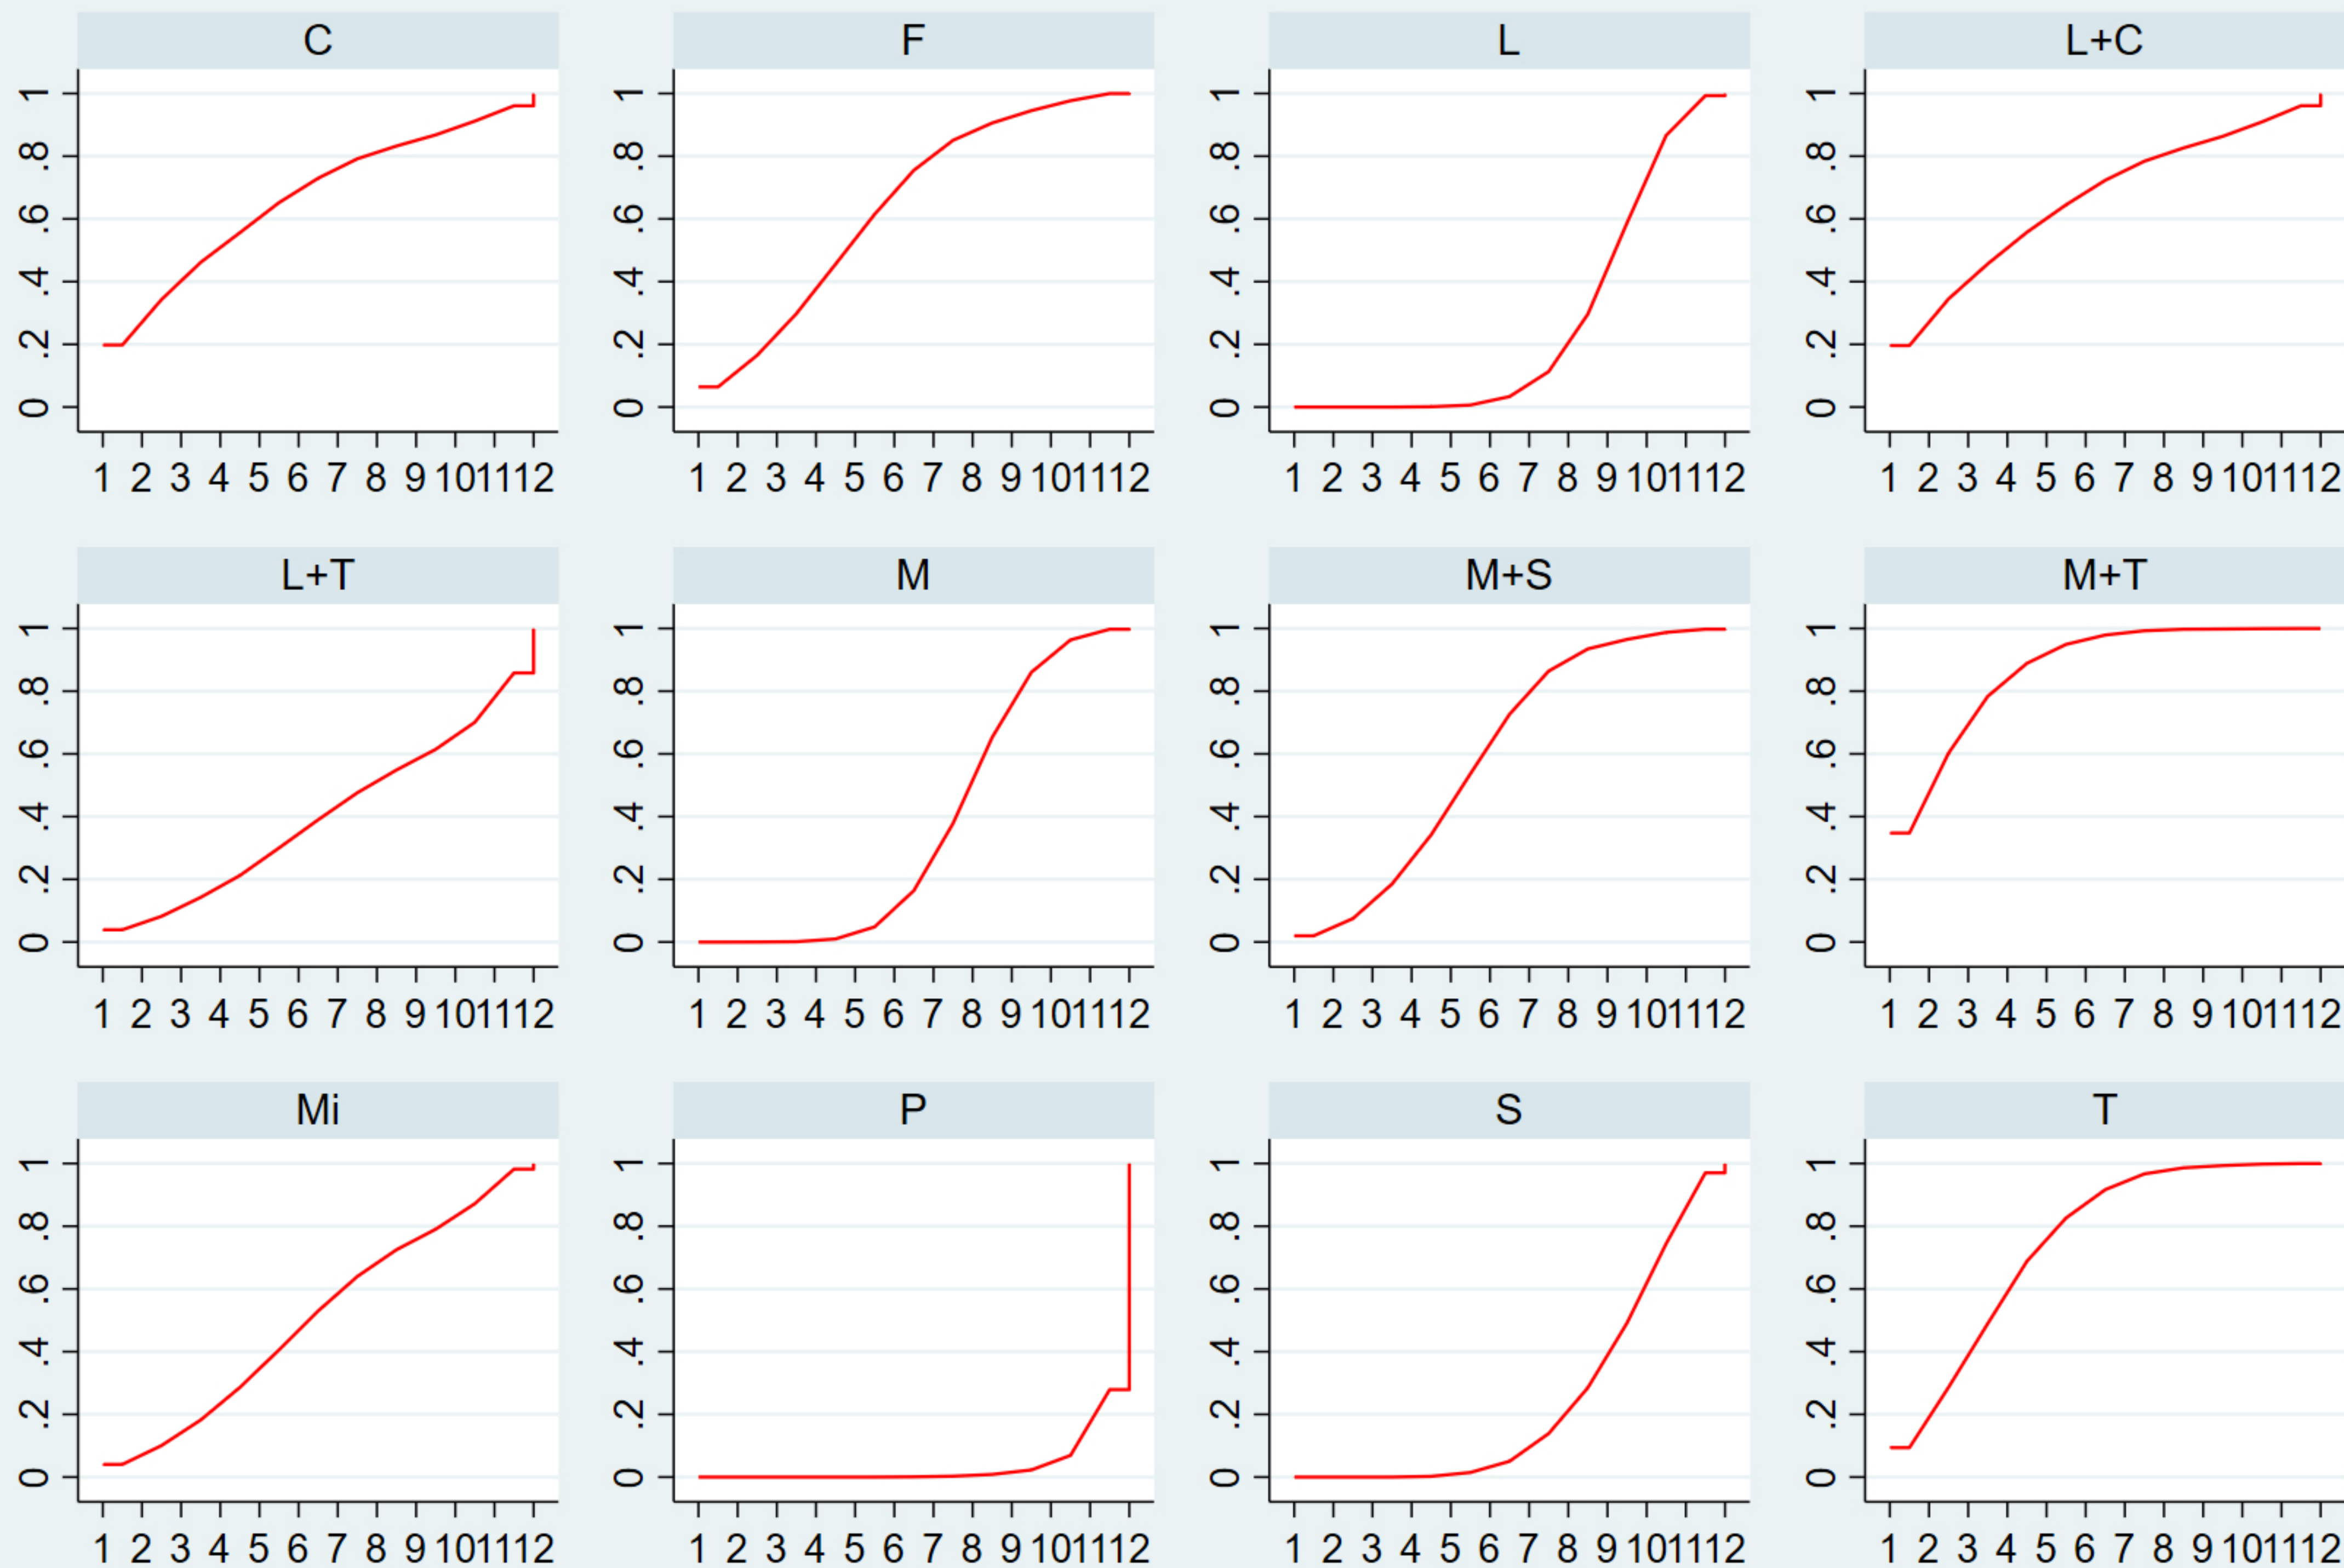

Rank

Graphs by Treatment

Supplement: f1 [file 3181427.f1.zip]

# Treatment Effect

# Mean with 95%CI and 95%PrI

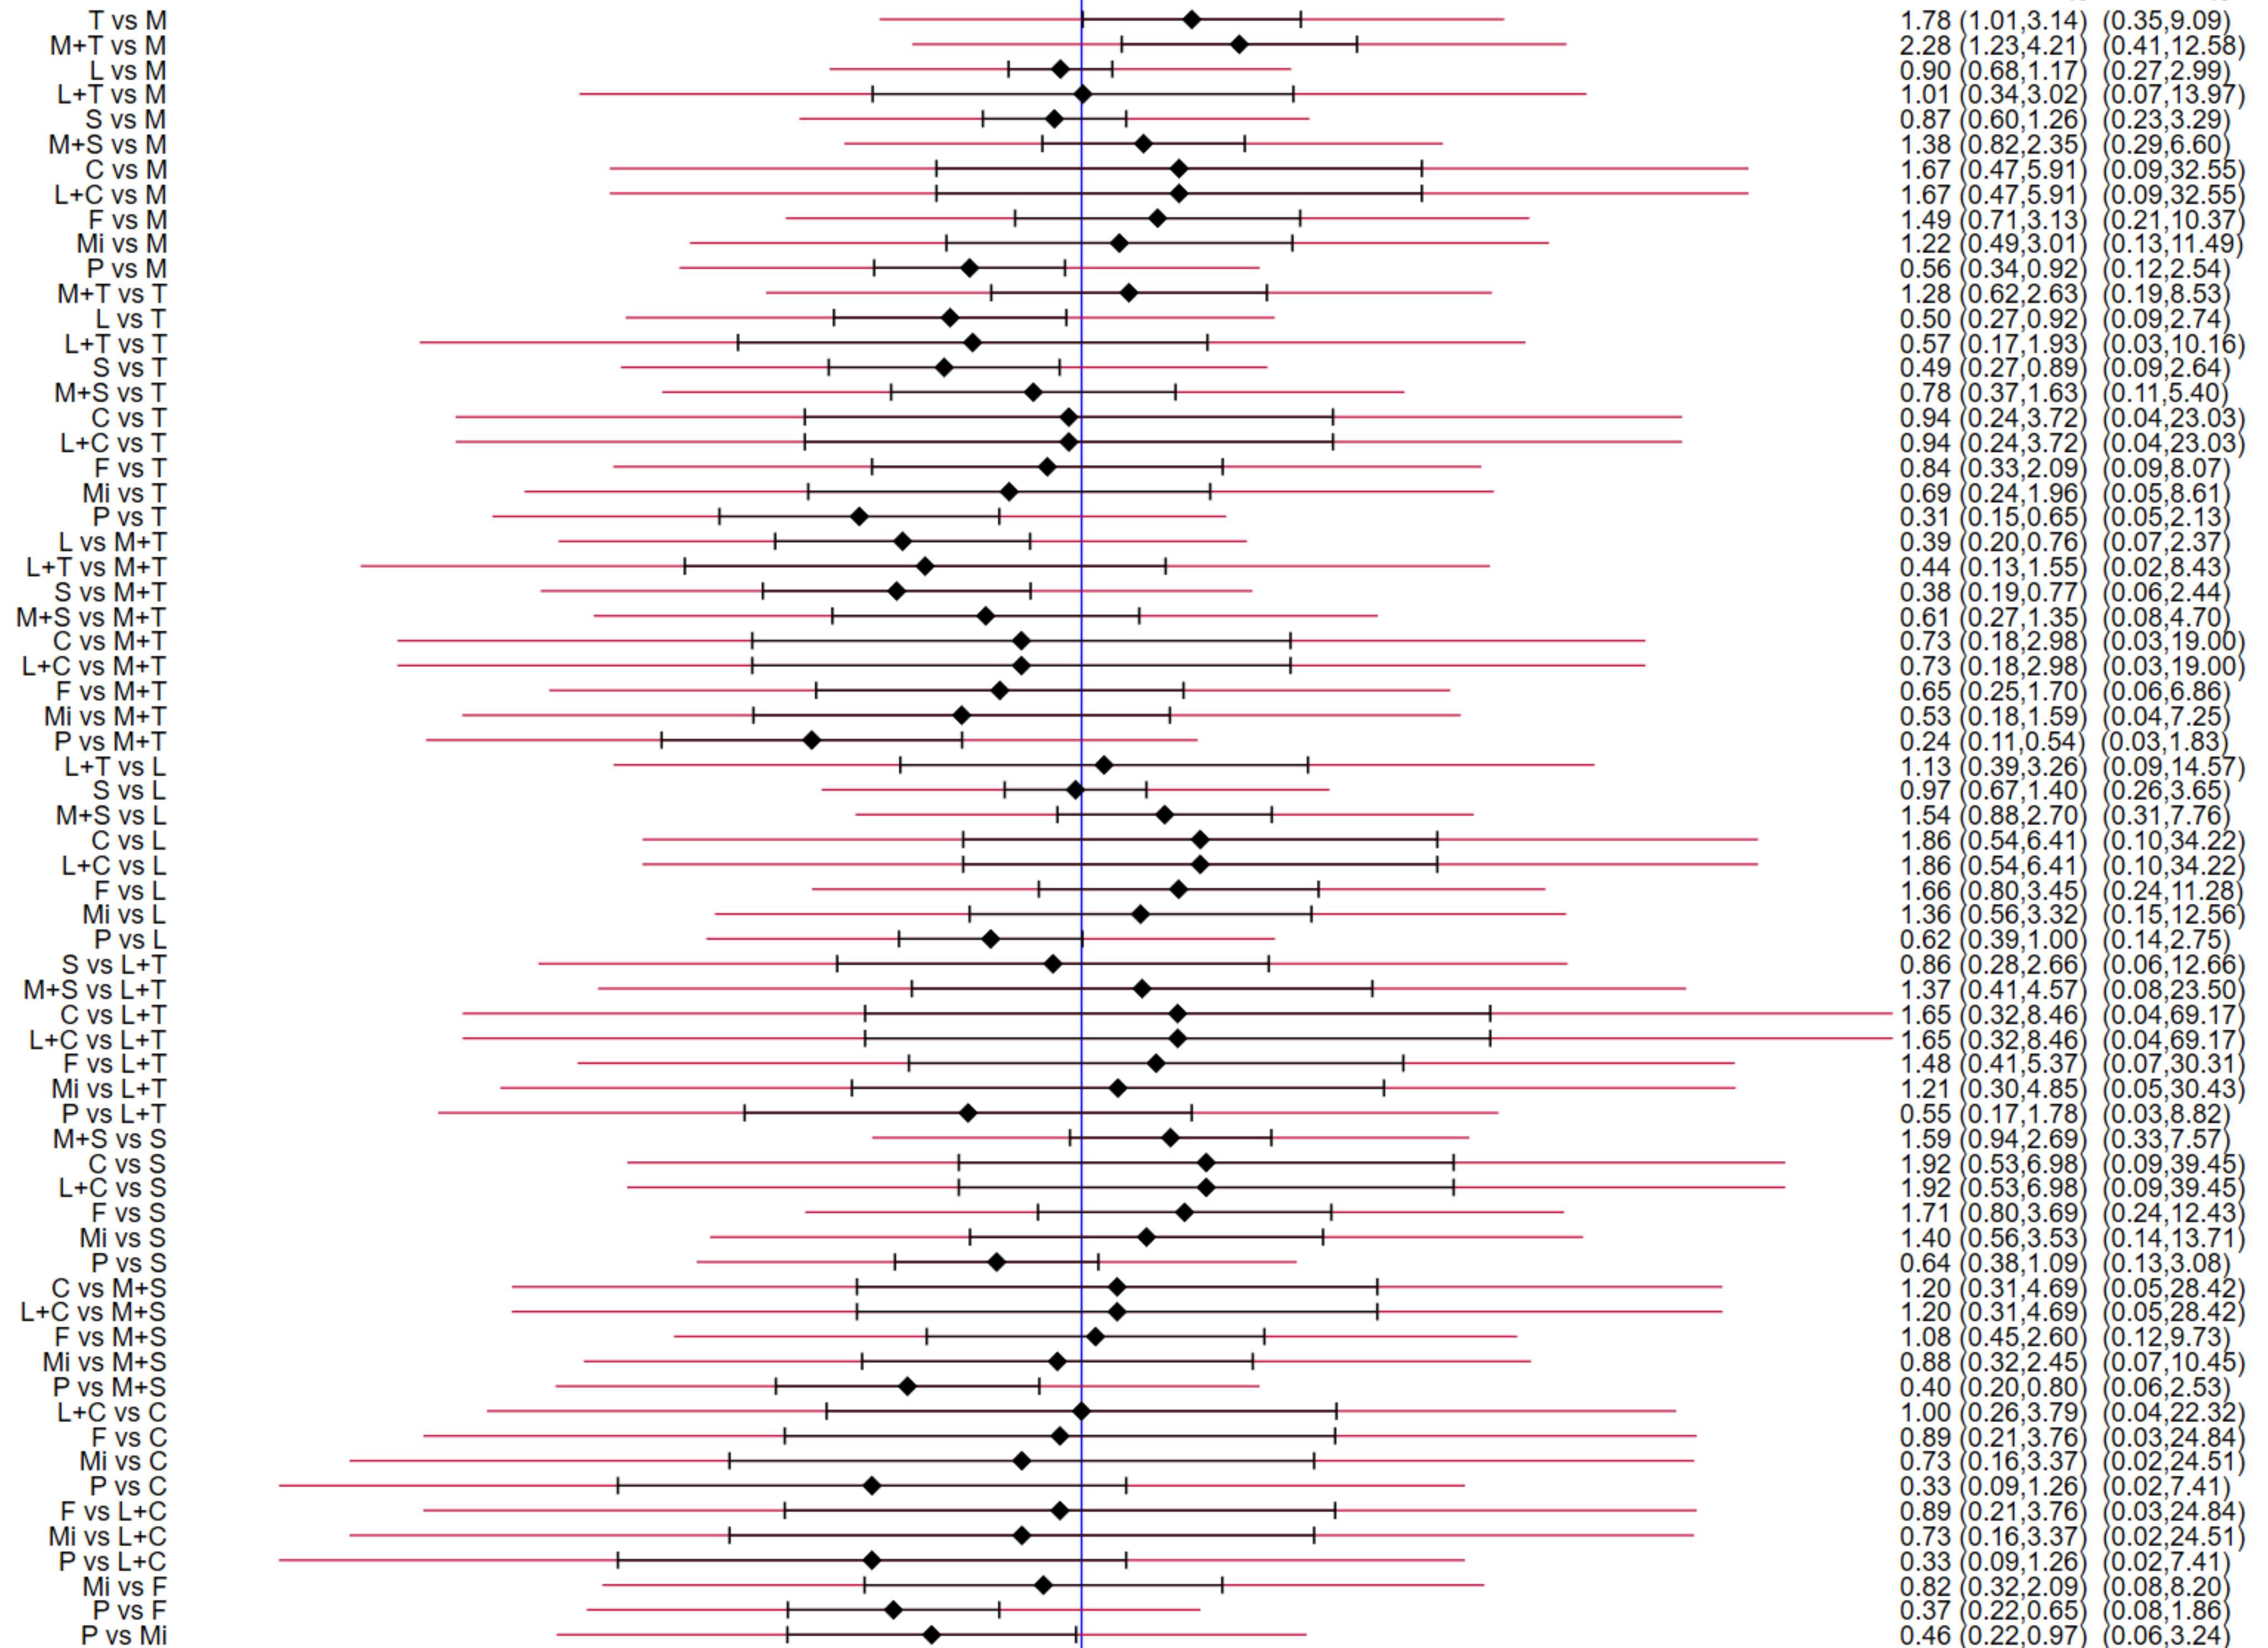

0

.1

1

8.2

67

Supplement: f1 [file 3181427.f1.zip]

# Treatment Effect

# Mean with 95%CI and 95%PrI

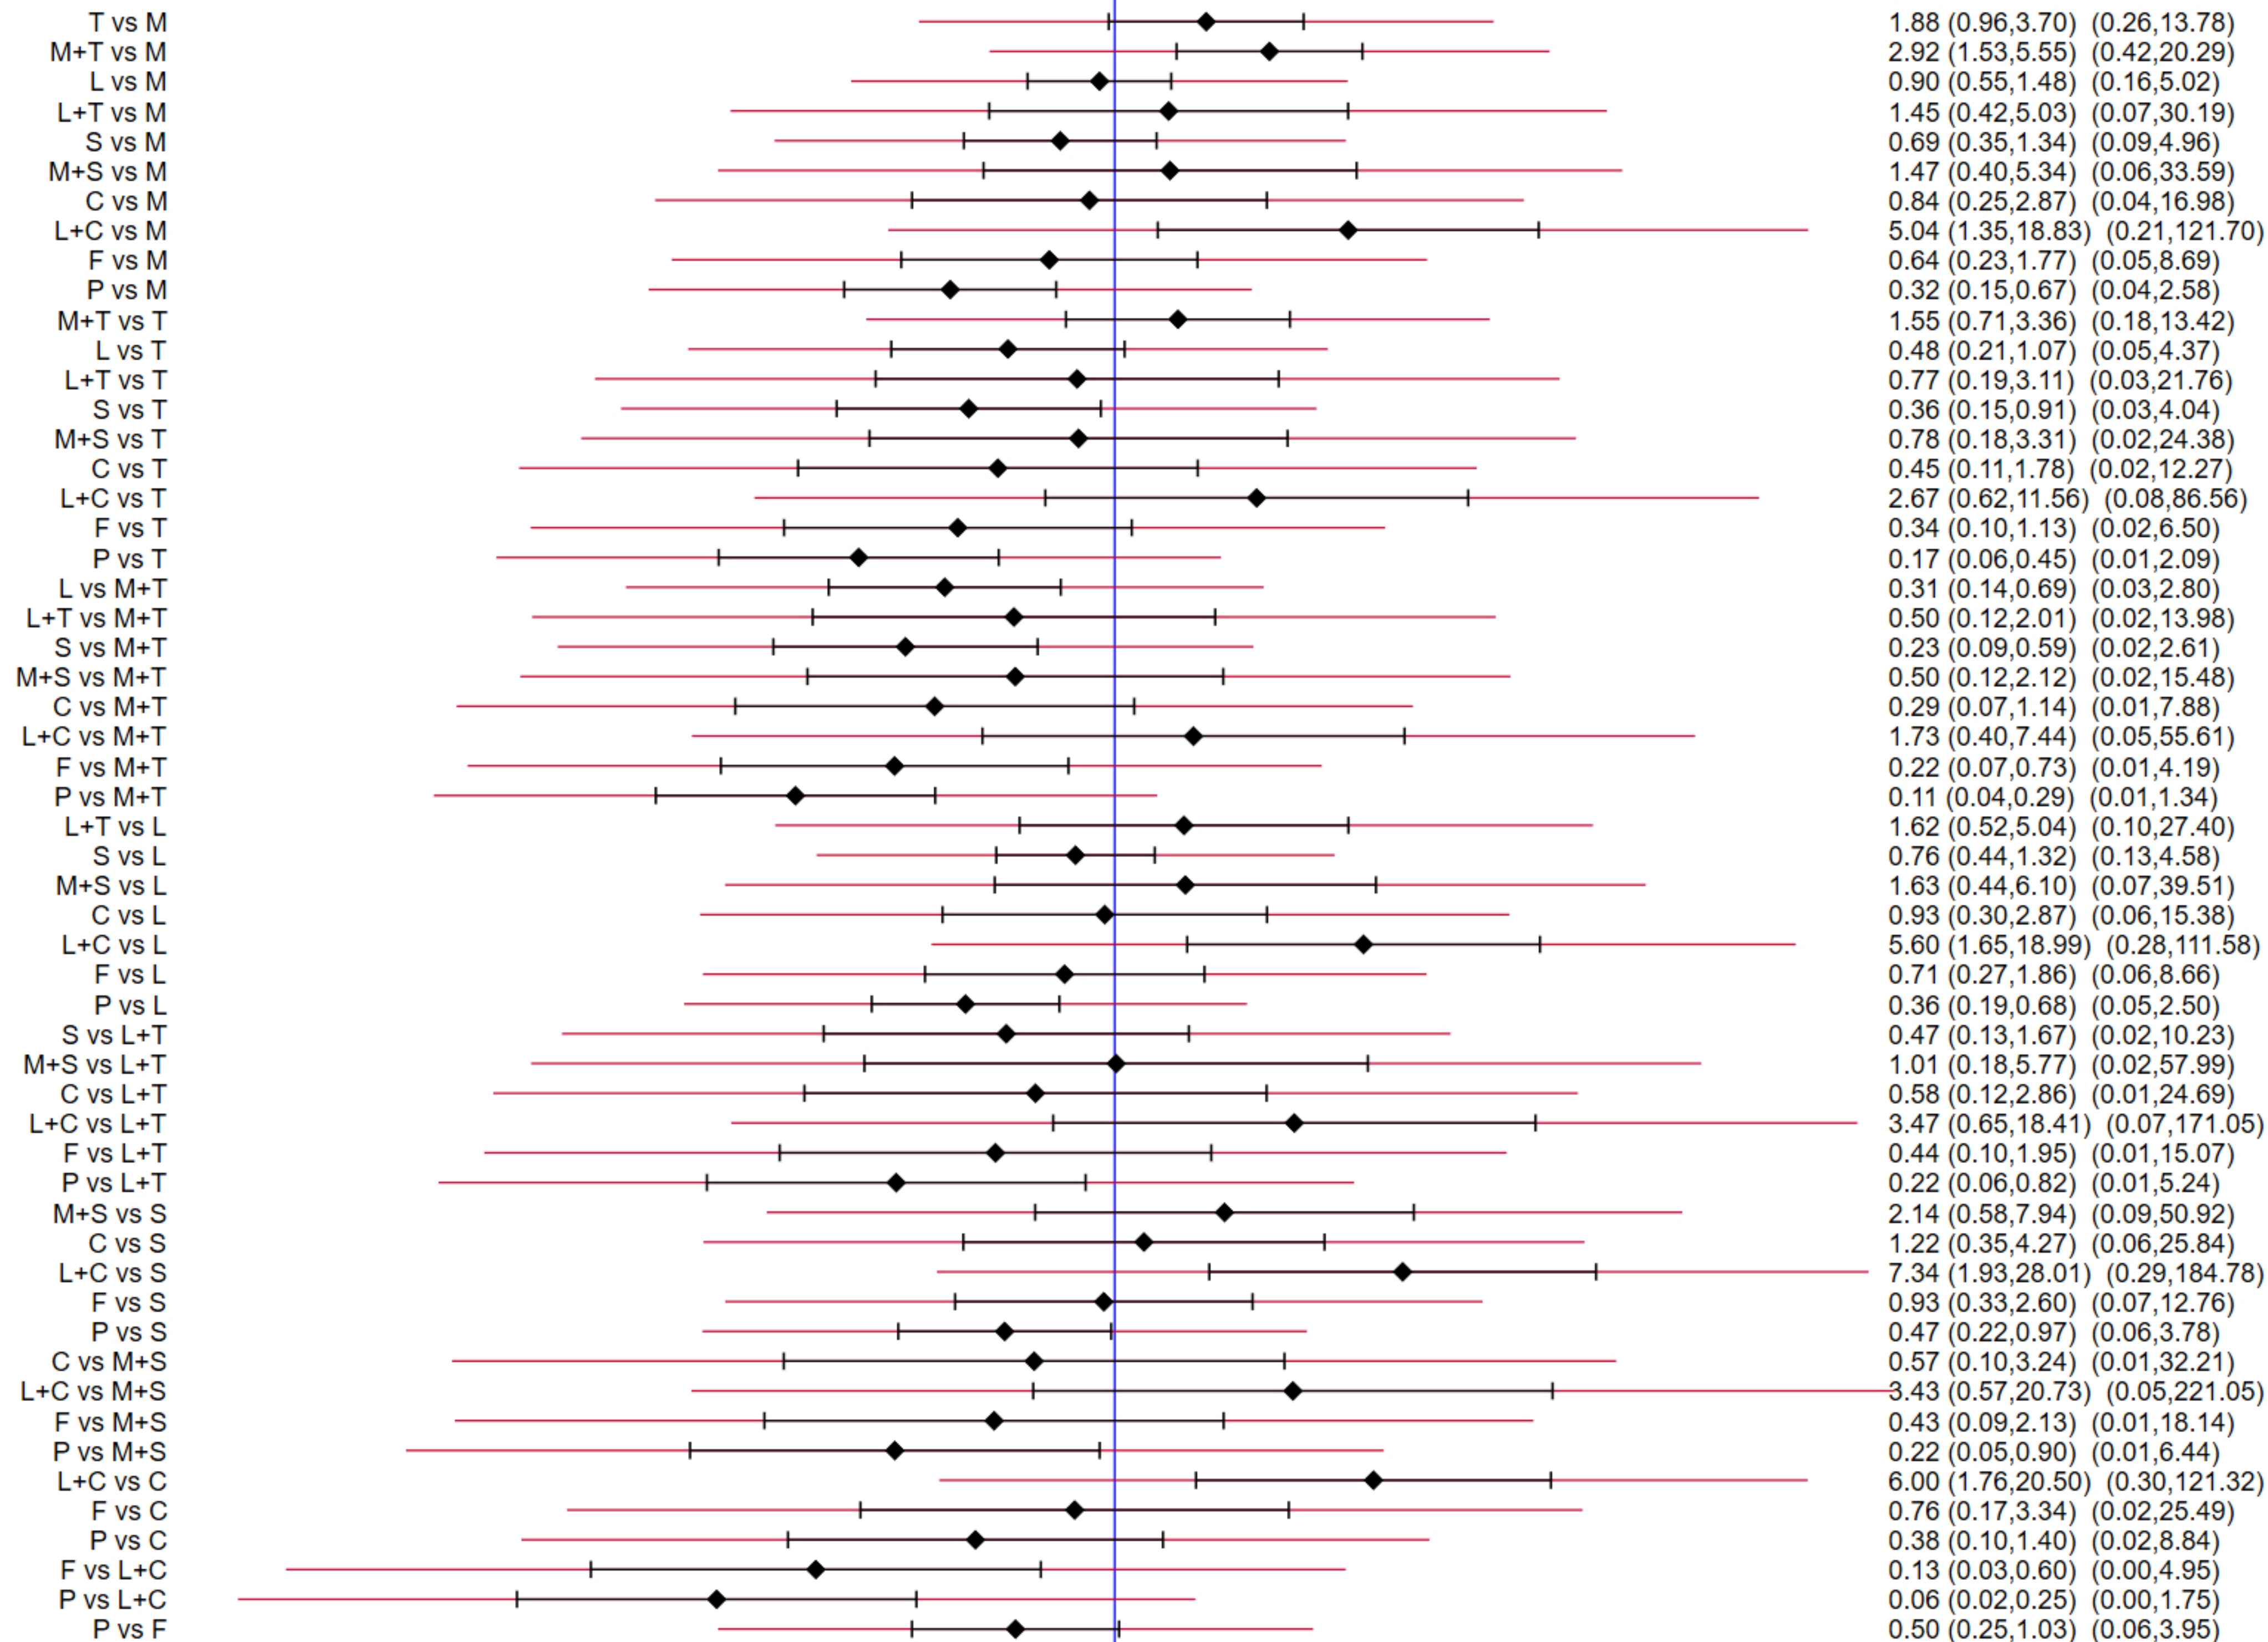

0

0

1

12

221

Supplement: f1 [file 3181427.f1.zip]

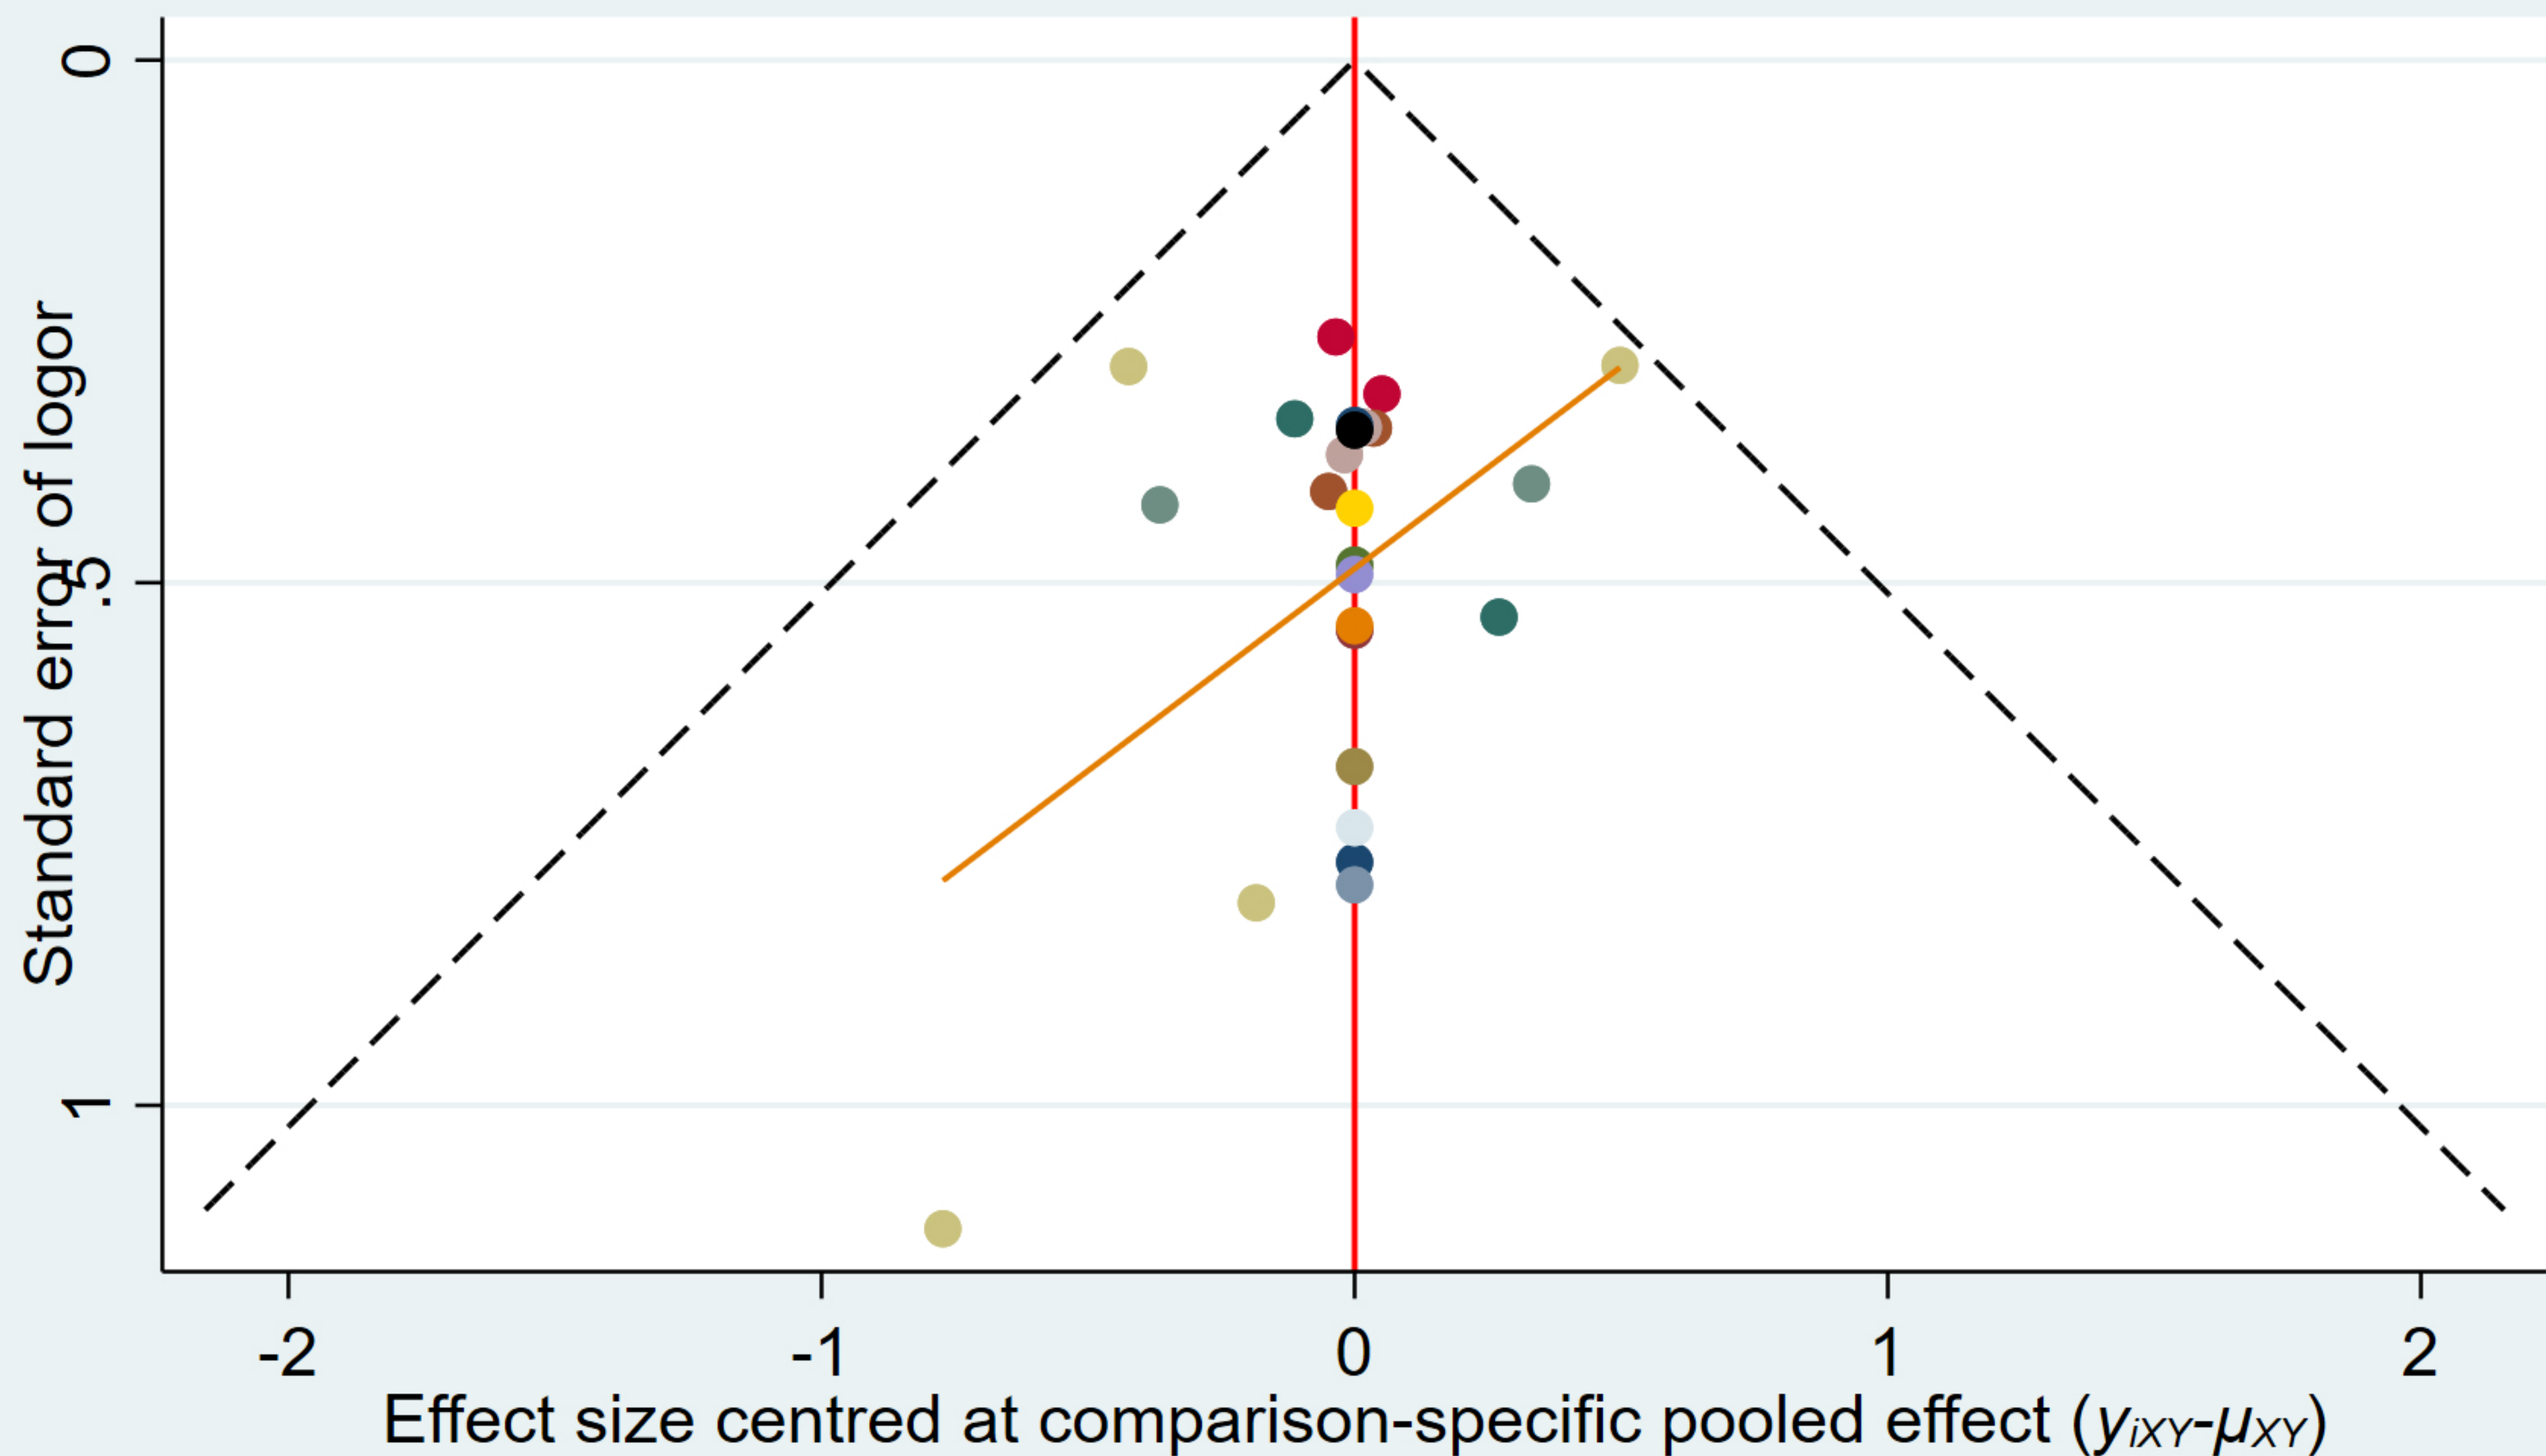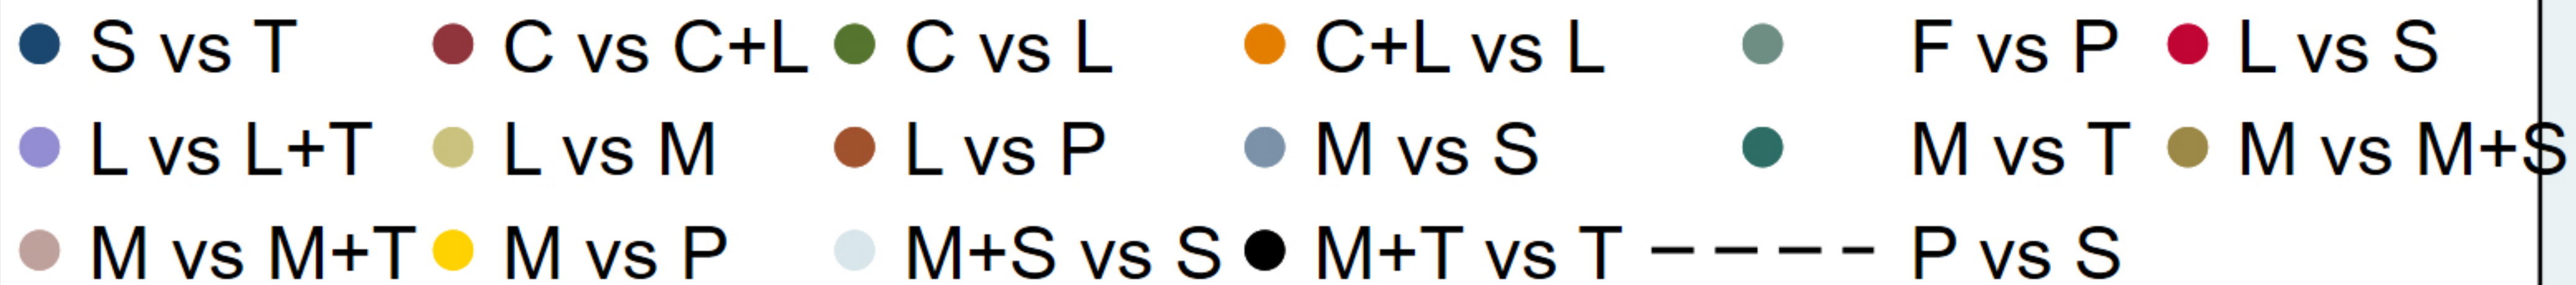

Supplement: f1 [file 3181427.f1.zip]

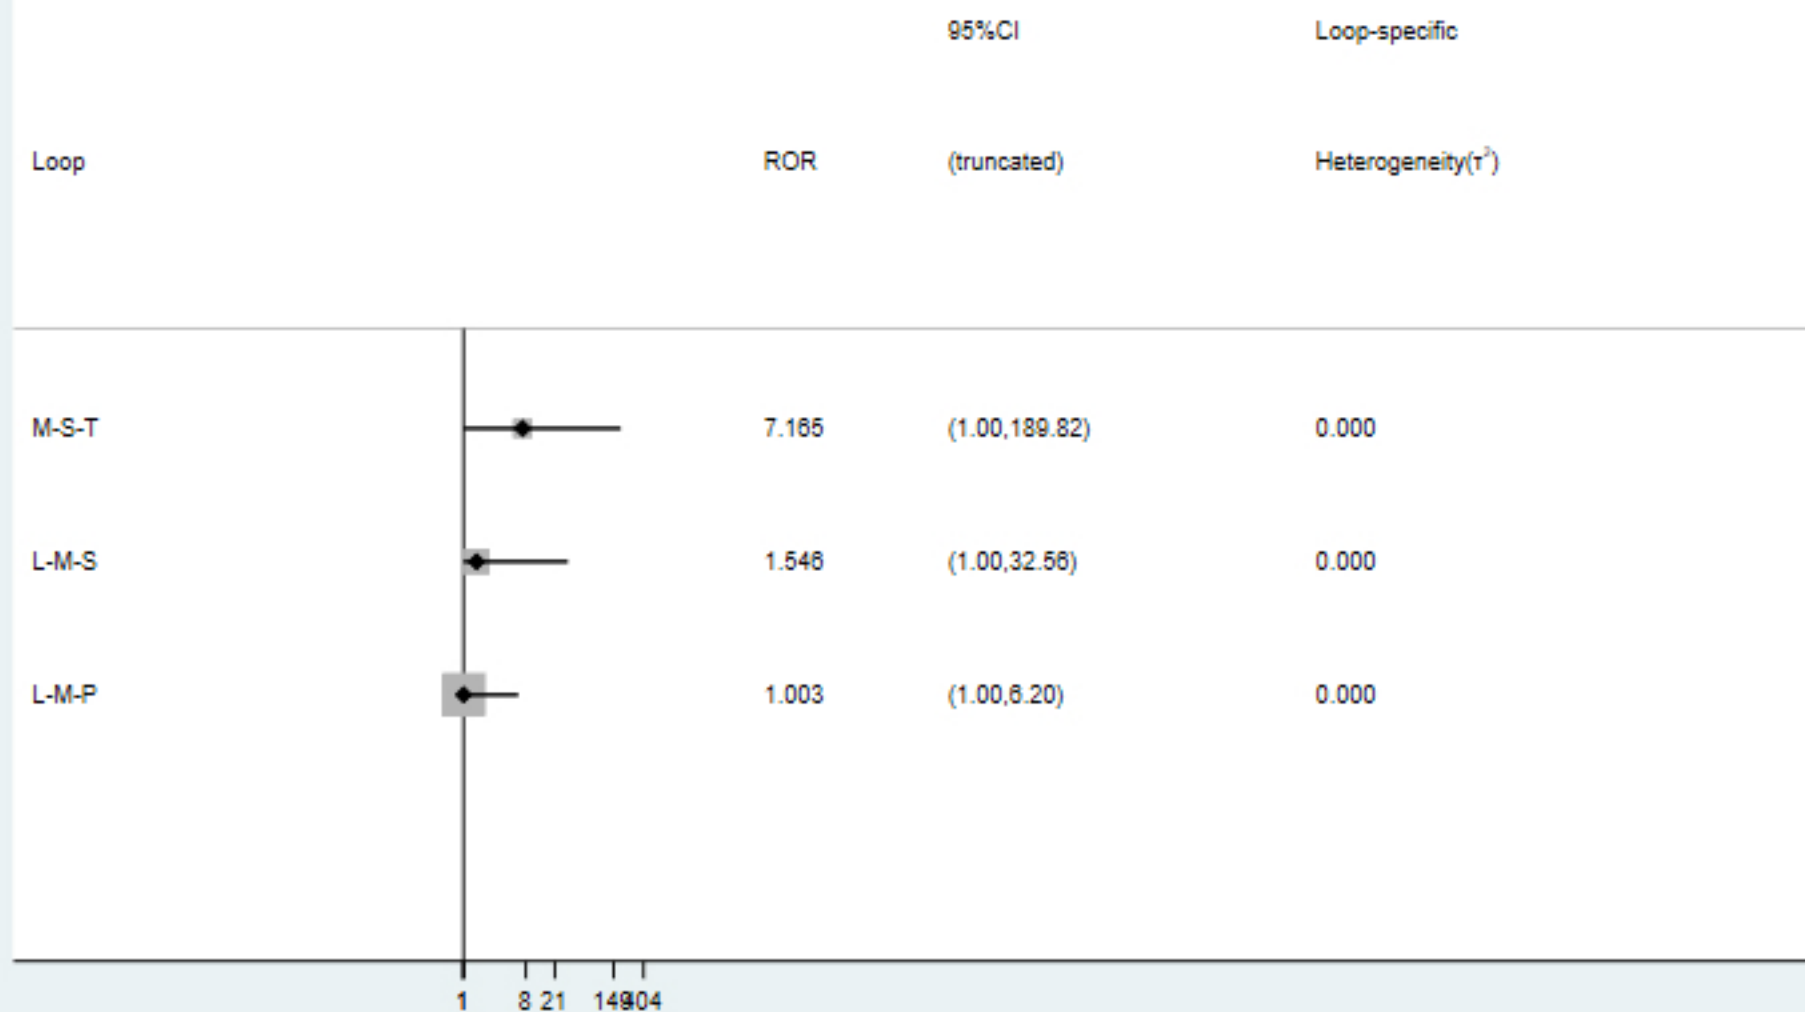

\*\*\* Loop(s) [C-L-L+C] [M-M+S-S] [M-M+T-T] are formed only by multi-arm trial(s) - Consistent by definition

Supplement: f1 [file 3181427.f1.zip]

# Treatment Effect

# Mean with 95%CI and 95%PrI

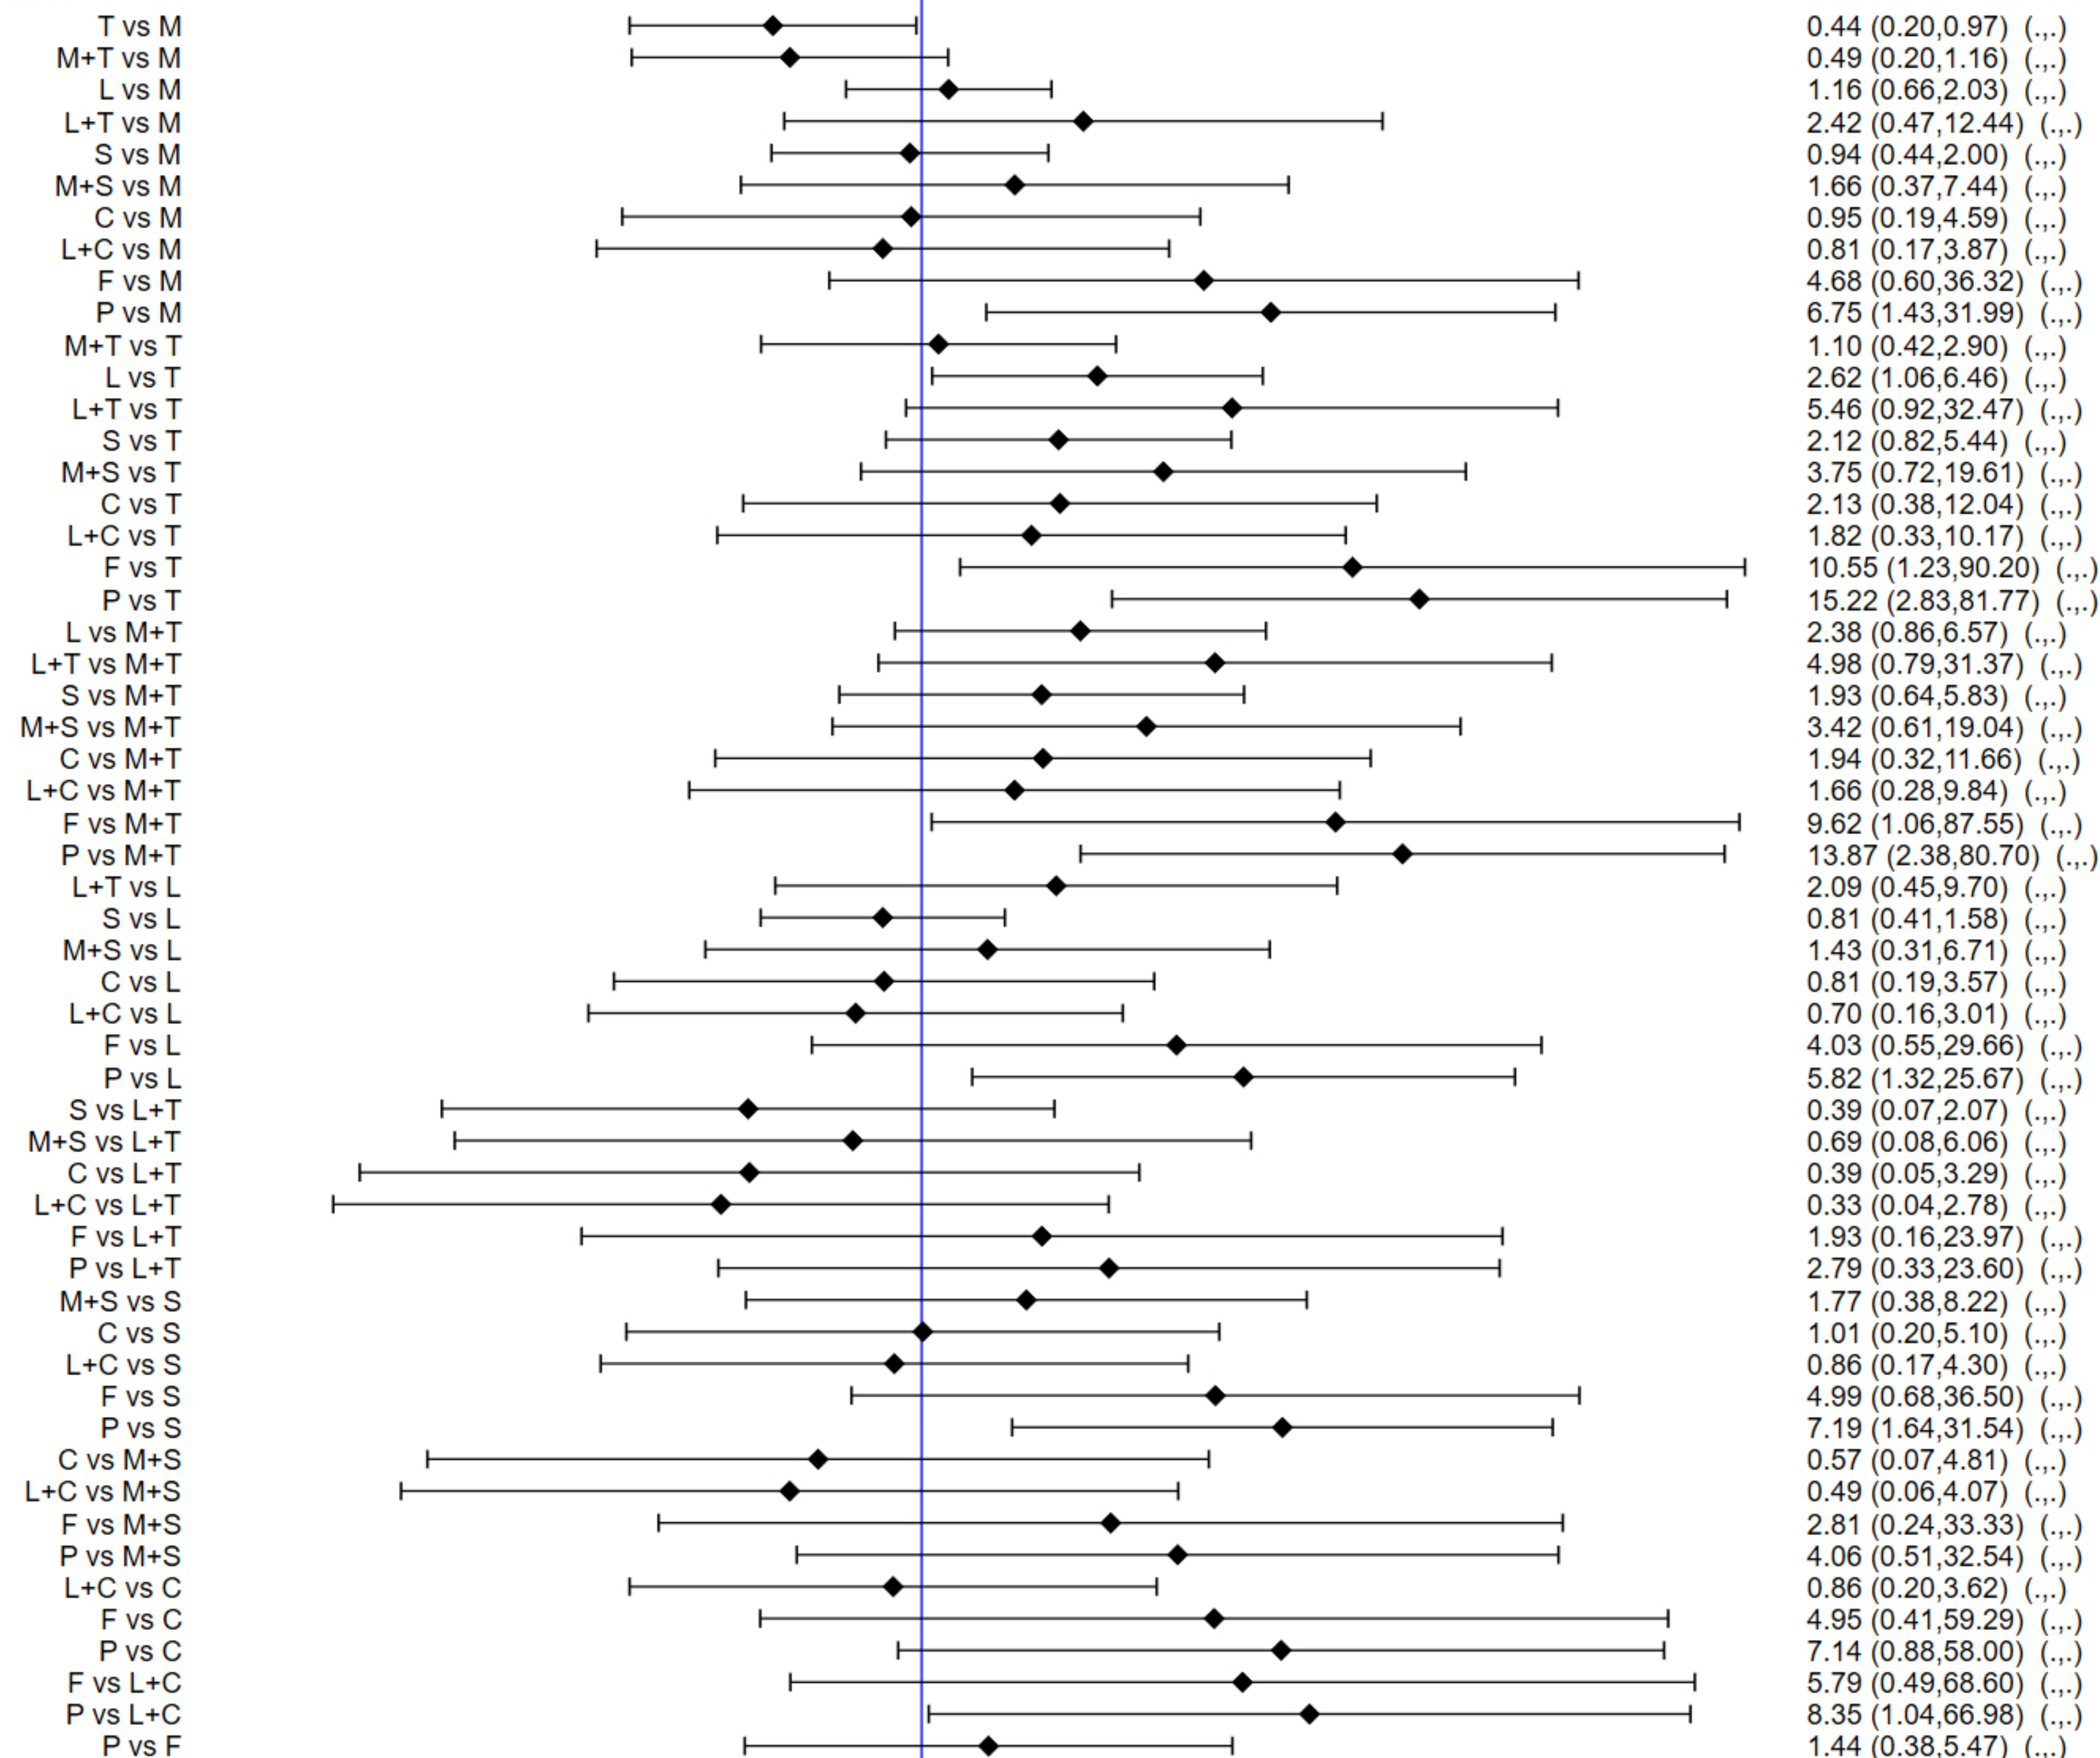

0

.3

1

14

90

Supplement: f1 [file 3181427.f1.zip]

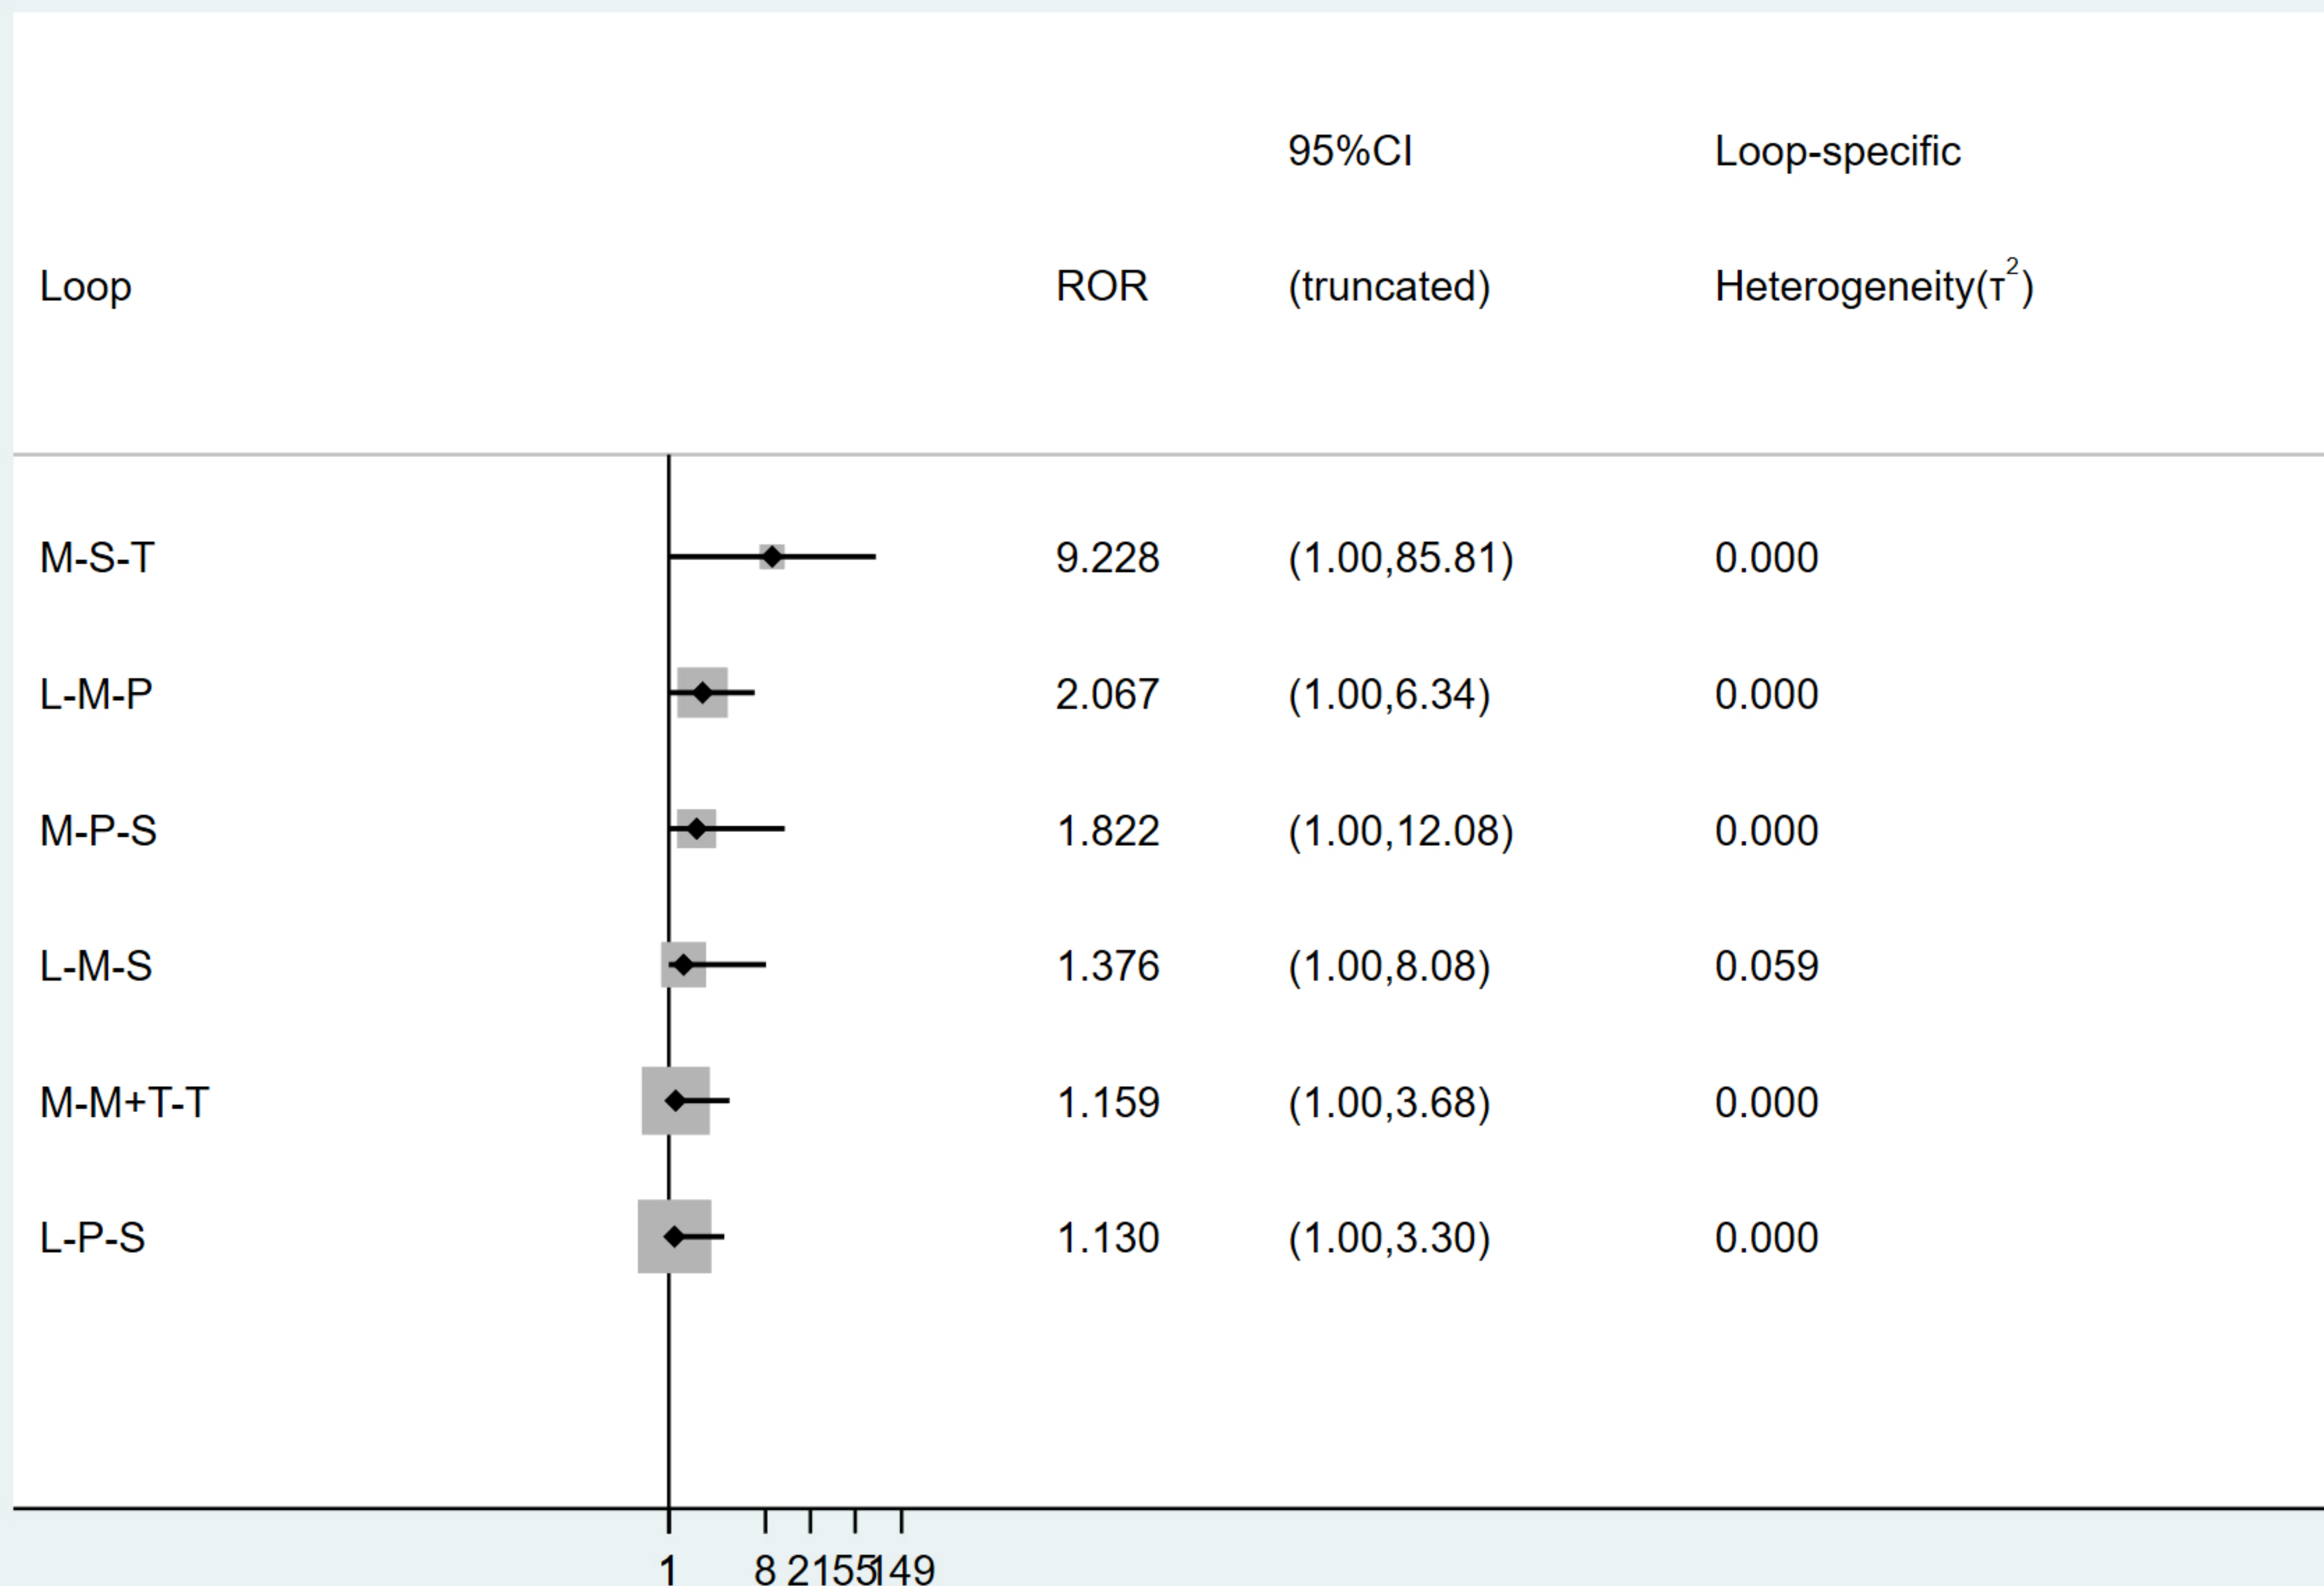

\*\*\* Loop(s) [C-C+L-L] [M-S-M+S] are formed only by multi-arm trial(s) - Consistent by definition

Supplement: f1 [file 3181427.f1.zip]

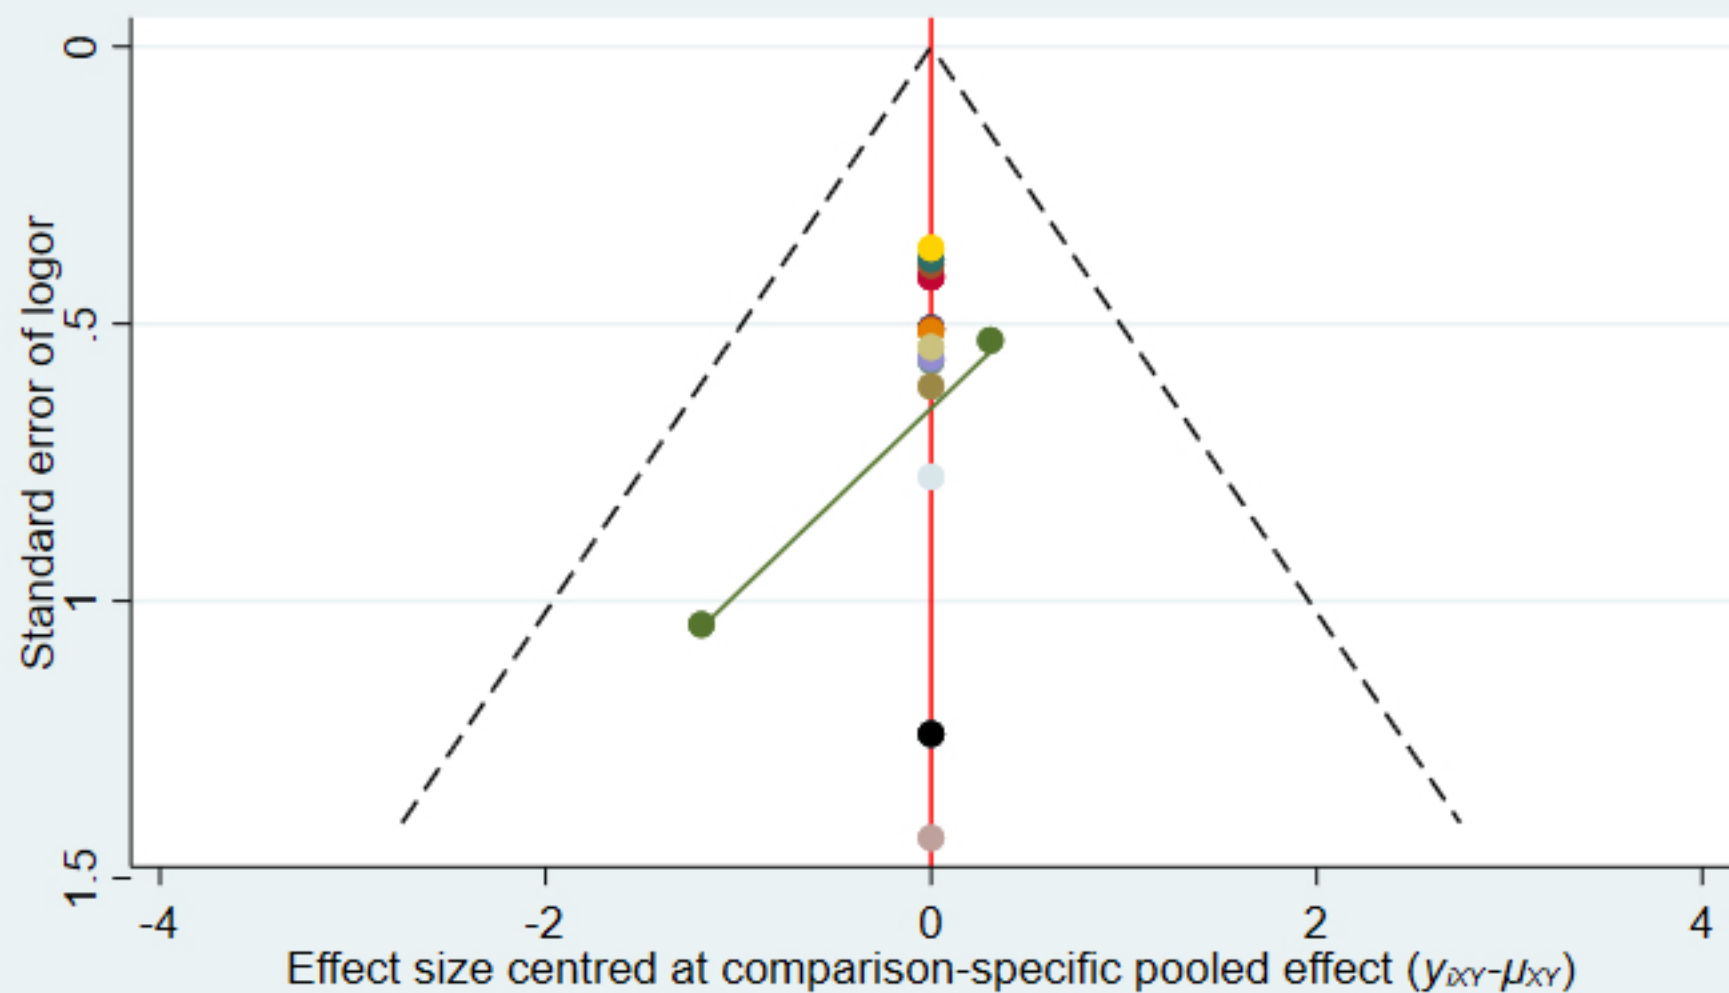

- C vs L
- C vs L+C
- F vs P
- L vs L+C
- L vs L+T
- L vs M
- L vs P
- L vs S
- M vs T
- M vs M+S
- M vs M+T
- M vs P
- M vs S
- M+T vs T
- S vs T
- S vs M+S

Supplement: f1 [file 3181427.f1.zip]

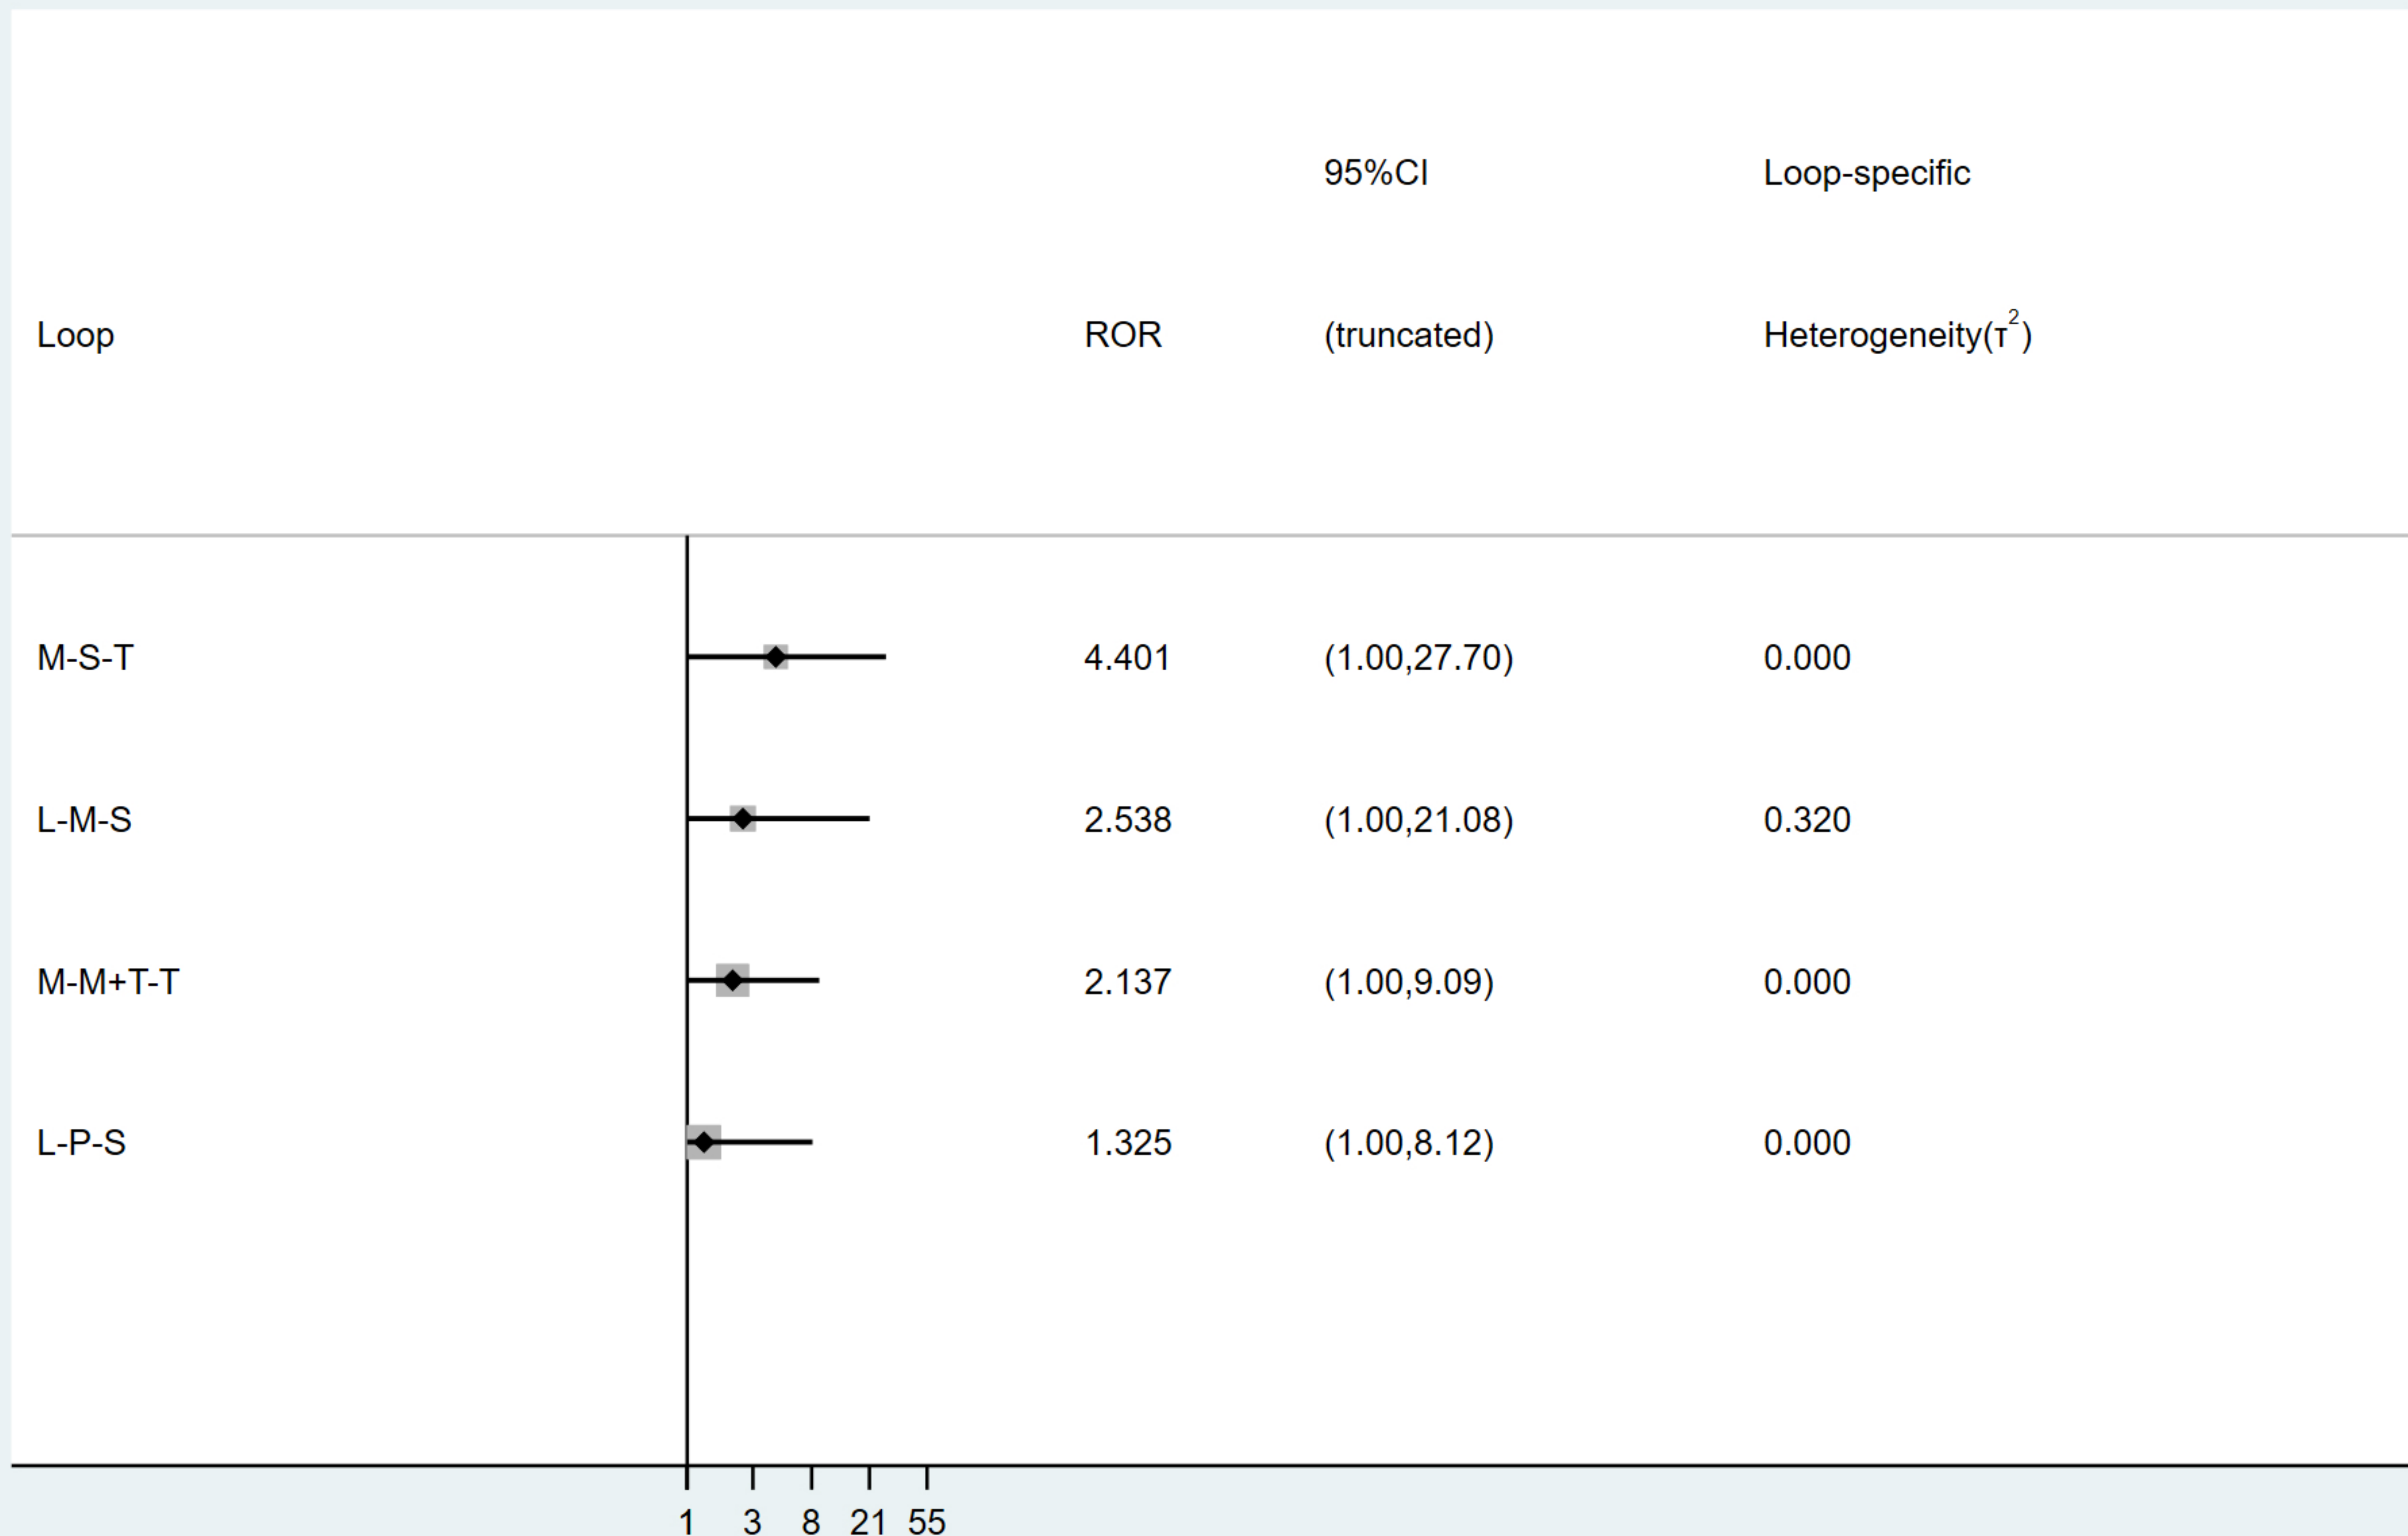

\*\*\* Loop(s) [C-L-L+C] [M-M+S-S] are formed only by multi-arm trial(s) - Consistent by definition

Supplement: f1 [file 3181427.f1.zip]

Cumulative Probabilities

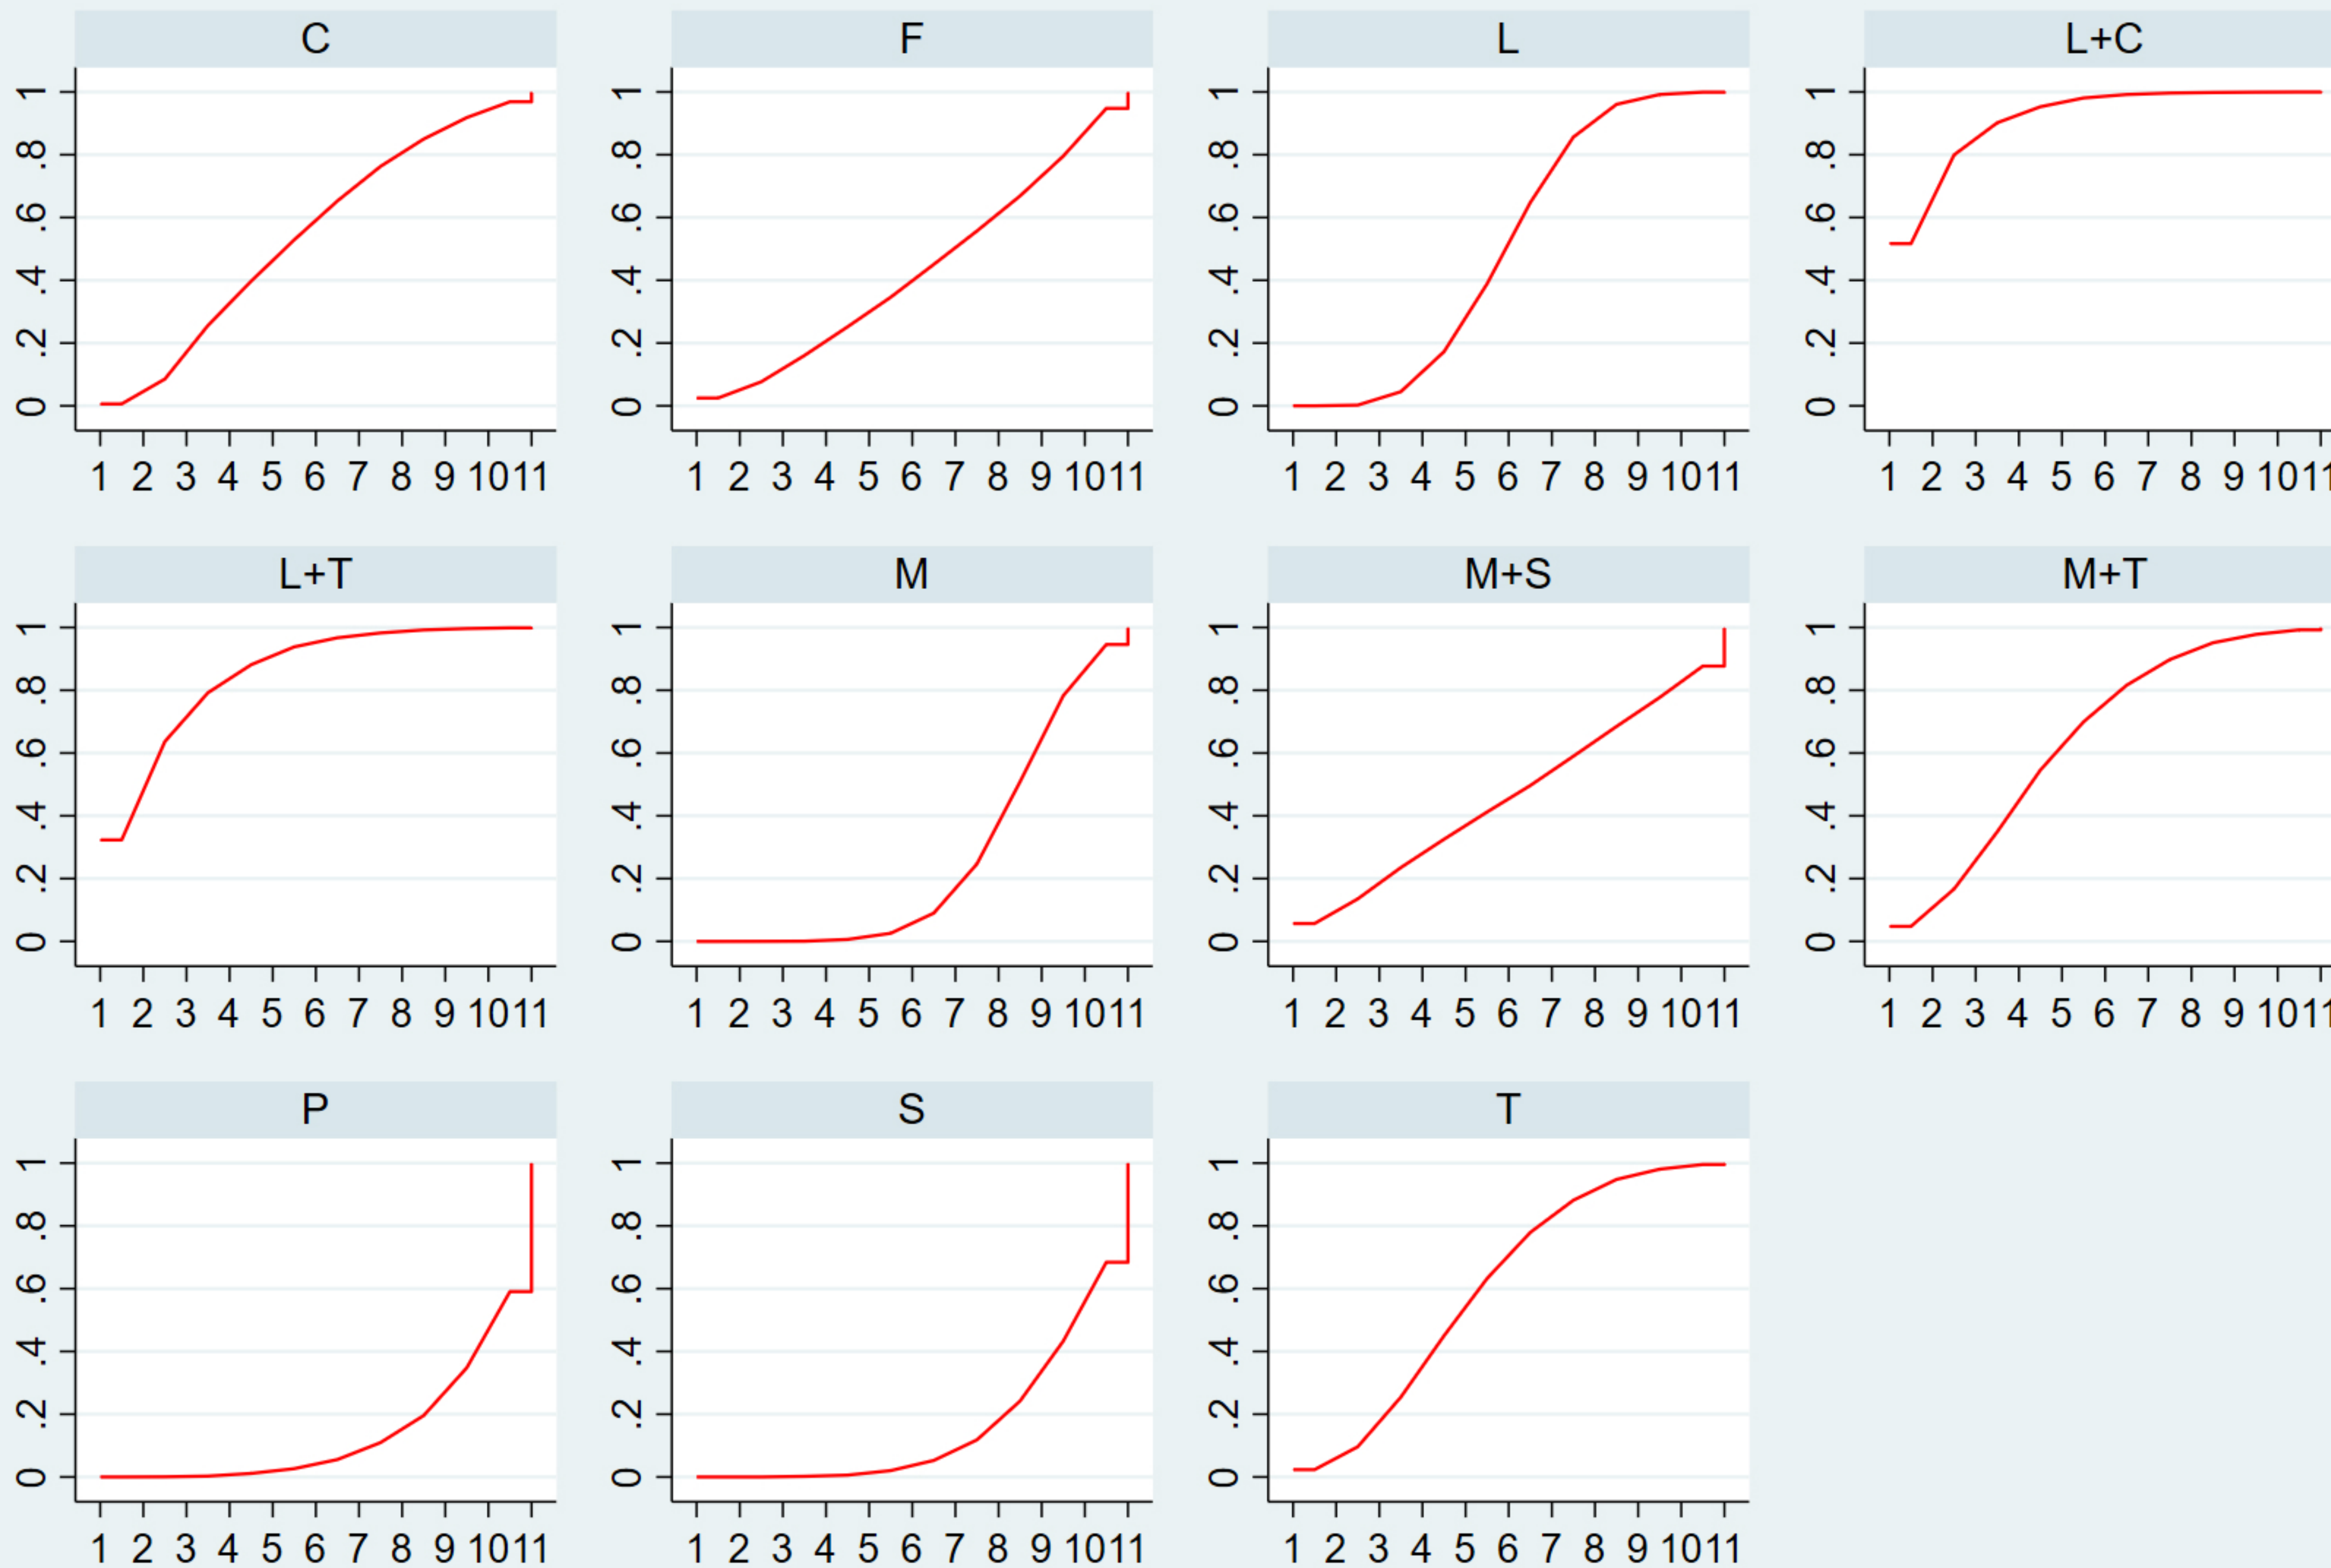

Rank

Graphs by Treatment

Supplement: f1 [file 3181427.f1.zip]

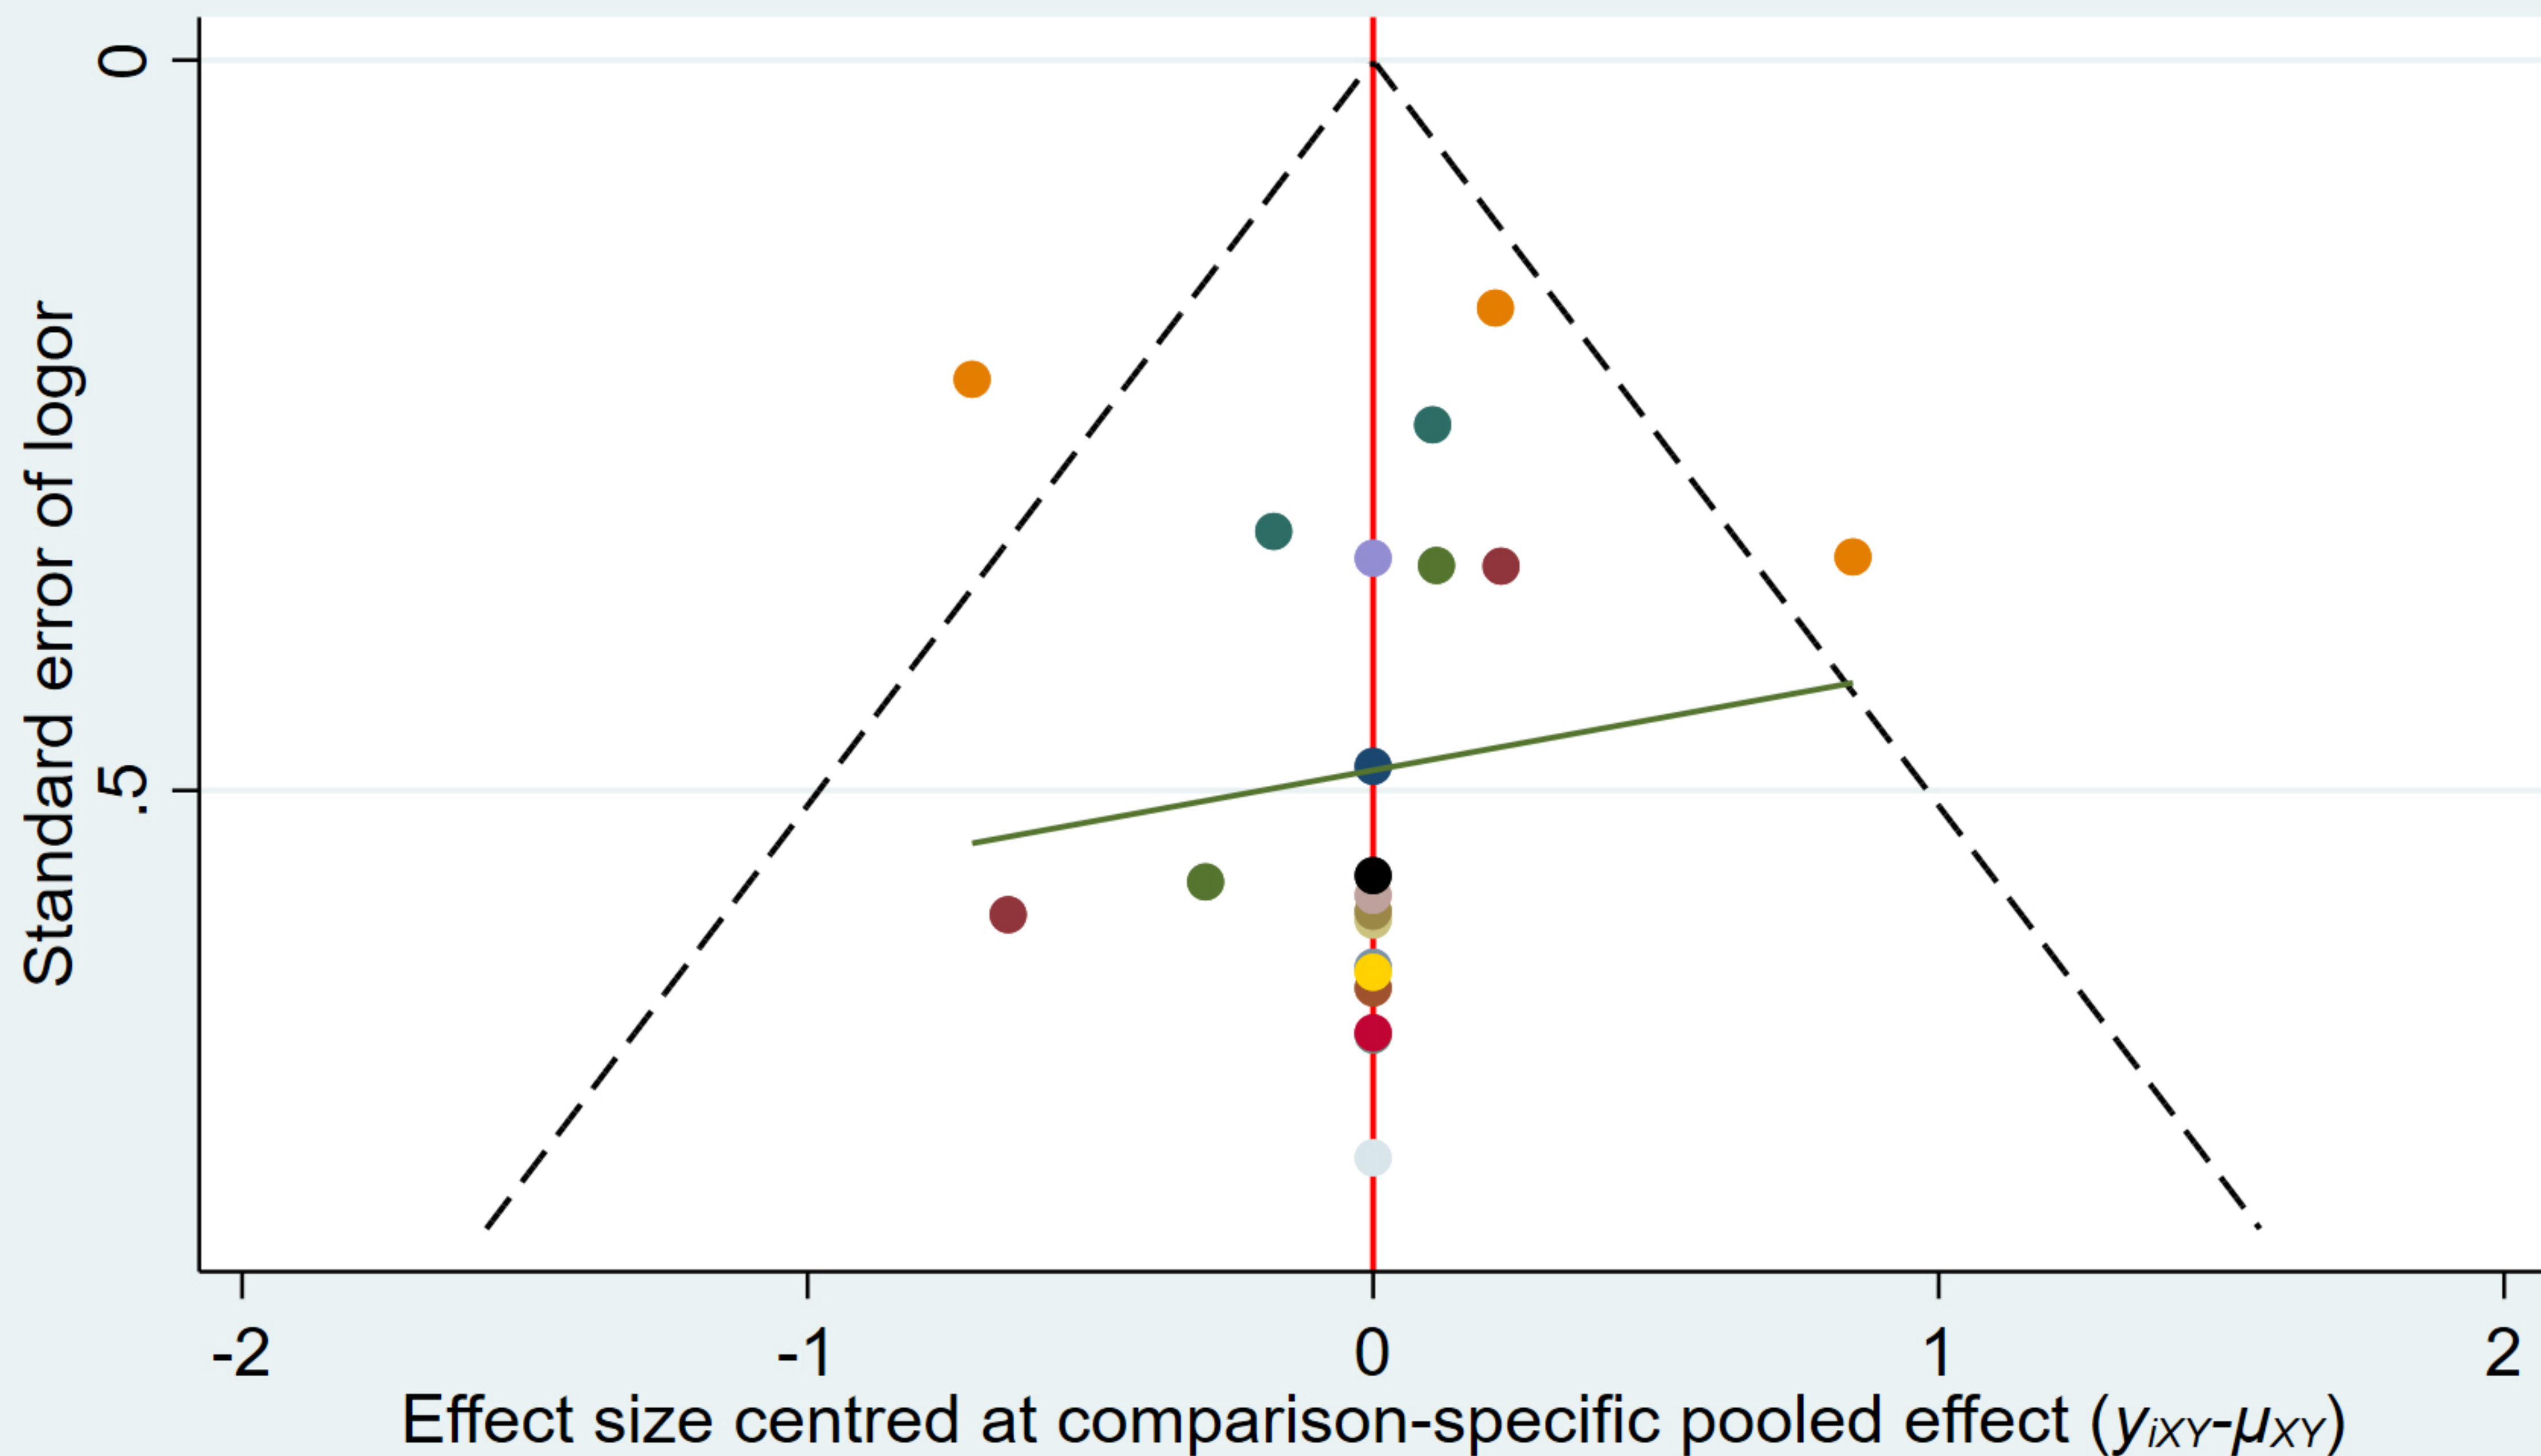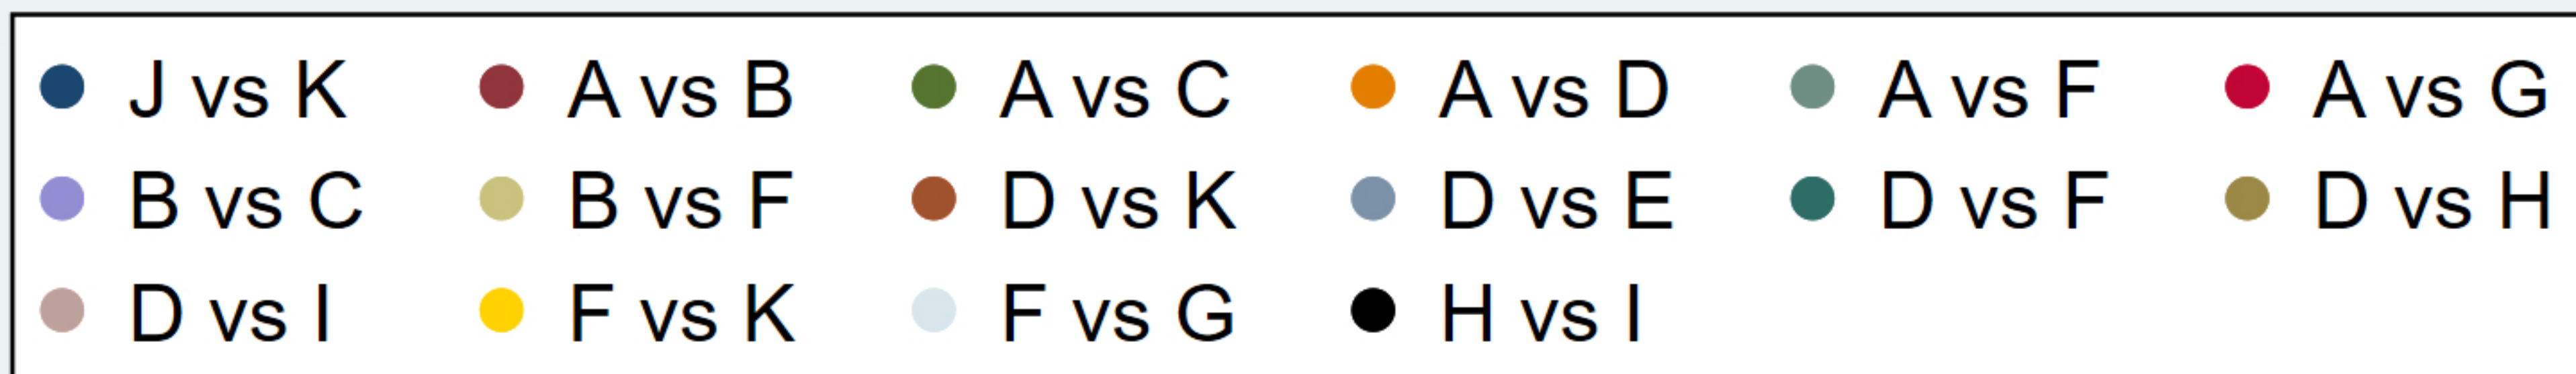

Supplement: f1 [file 3181427.f1.zip]

Cumulative Probabilities

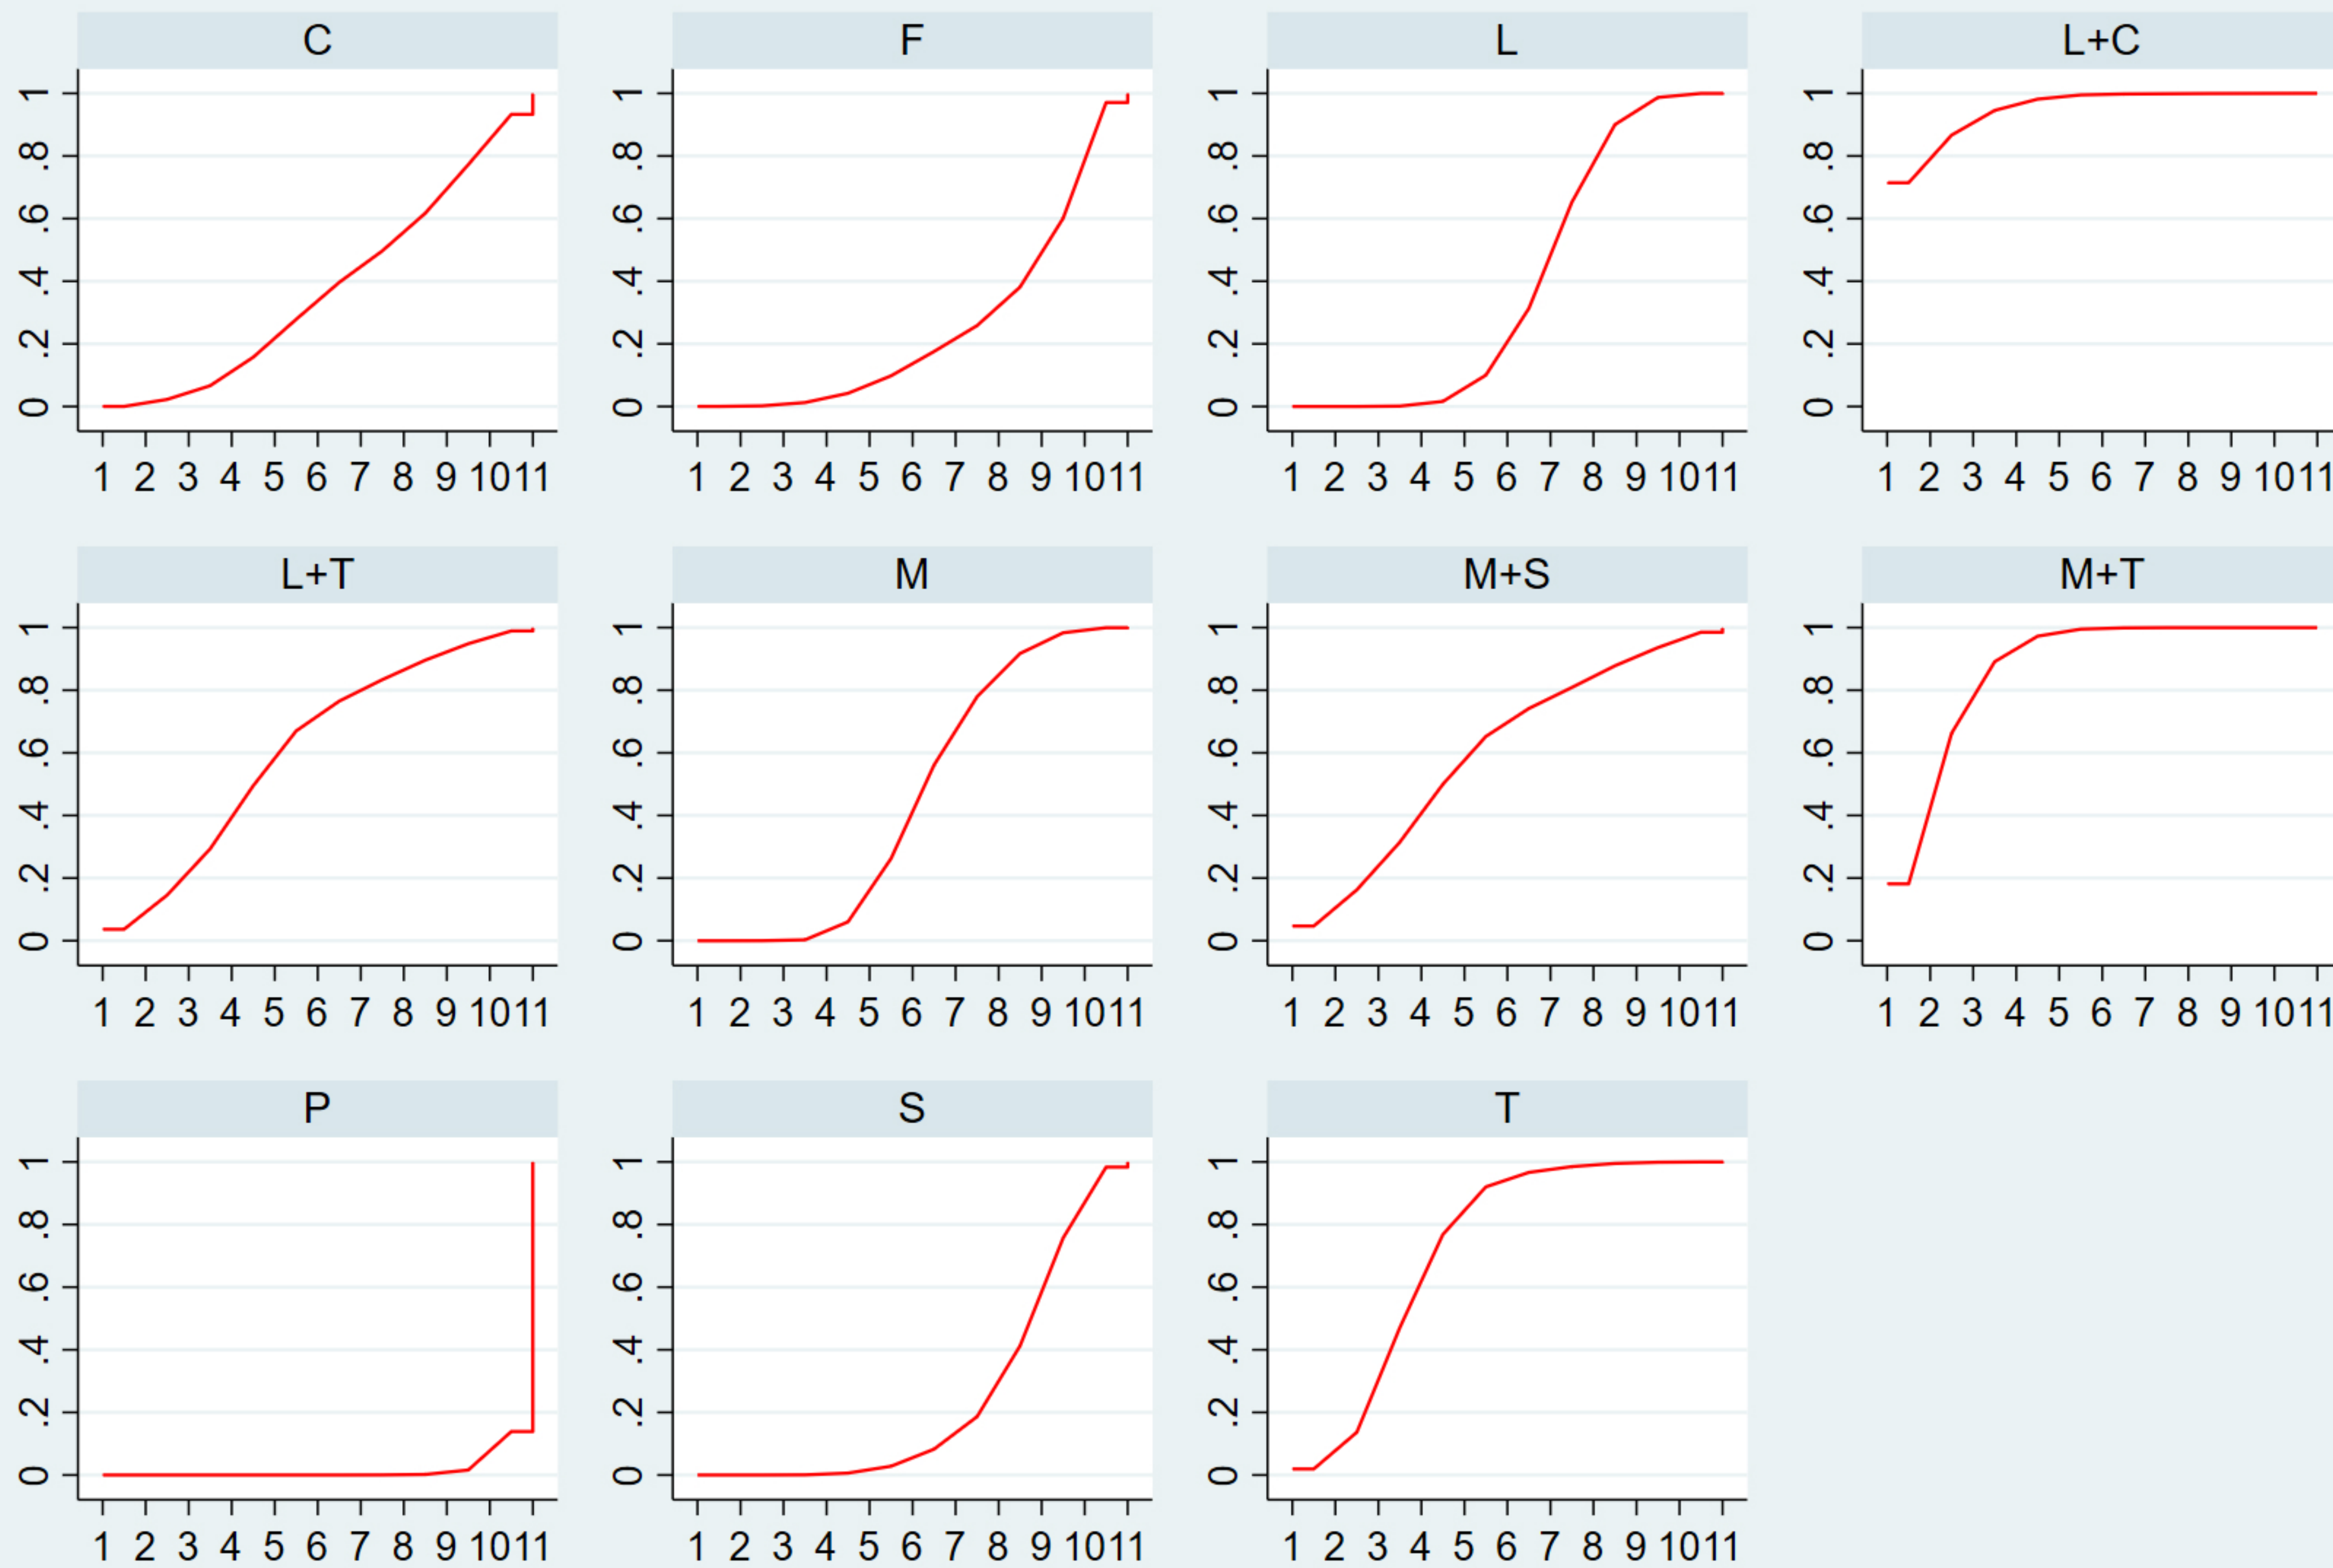

Rank

Graphs by Treatment

Supplement: f1 [file 3181427.f1.zip]

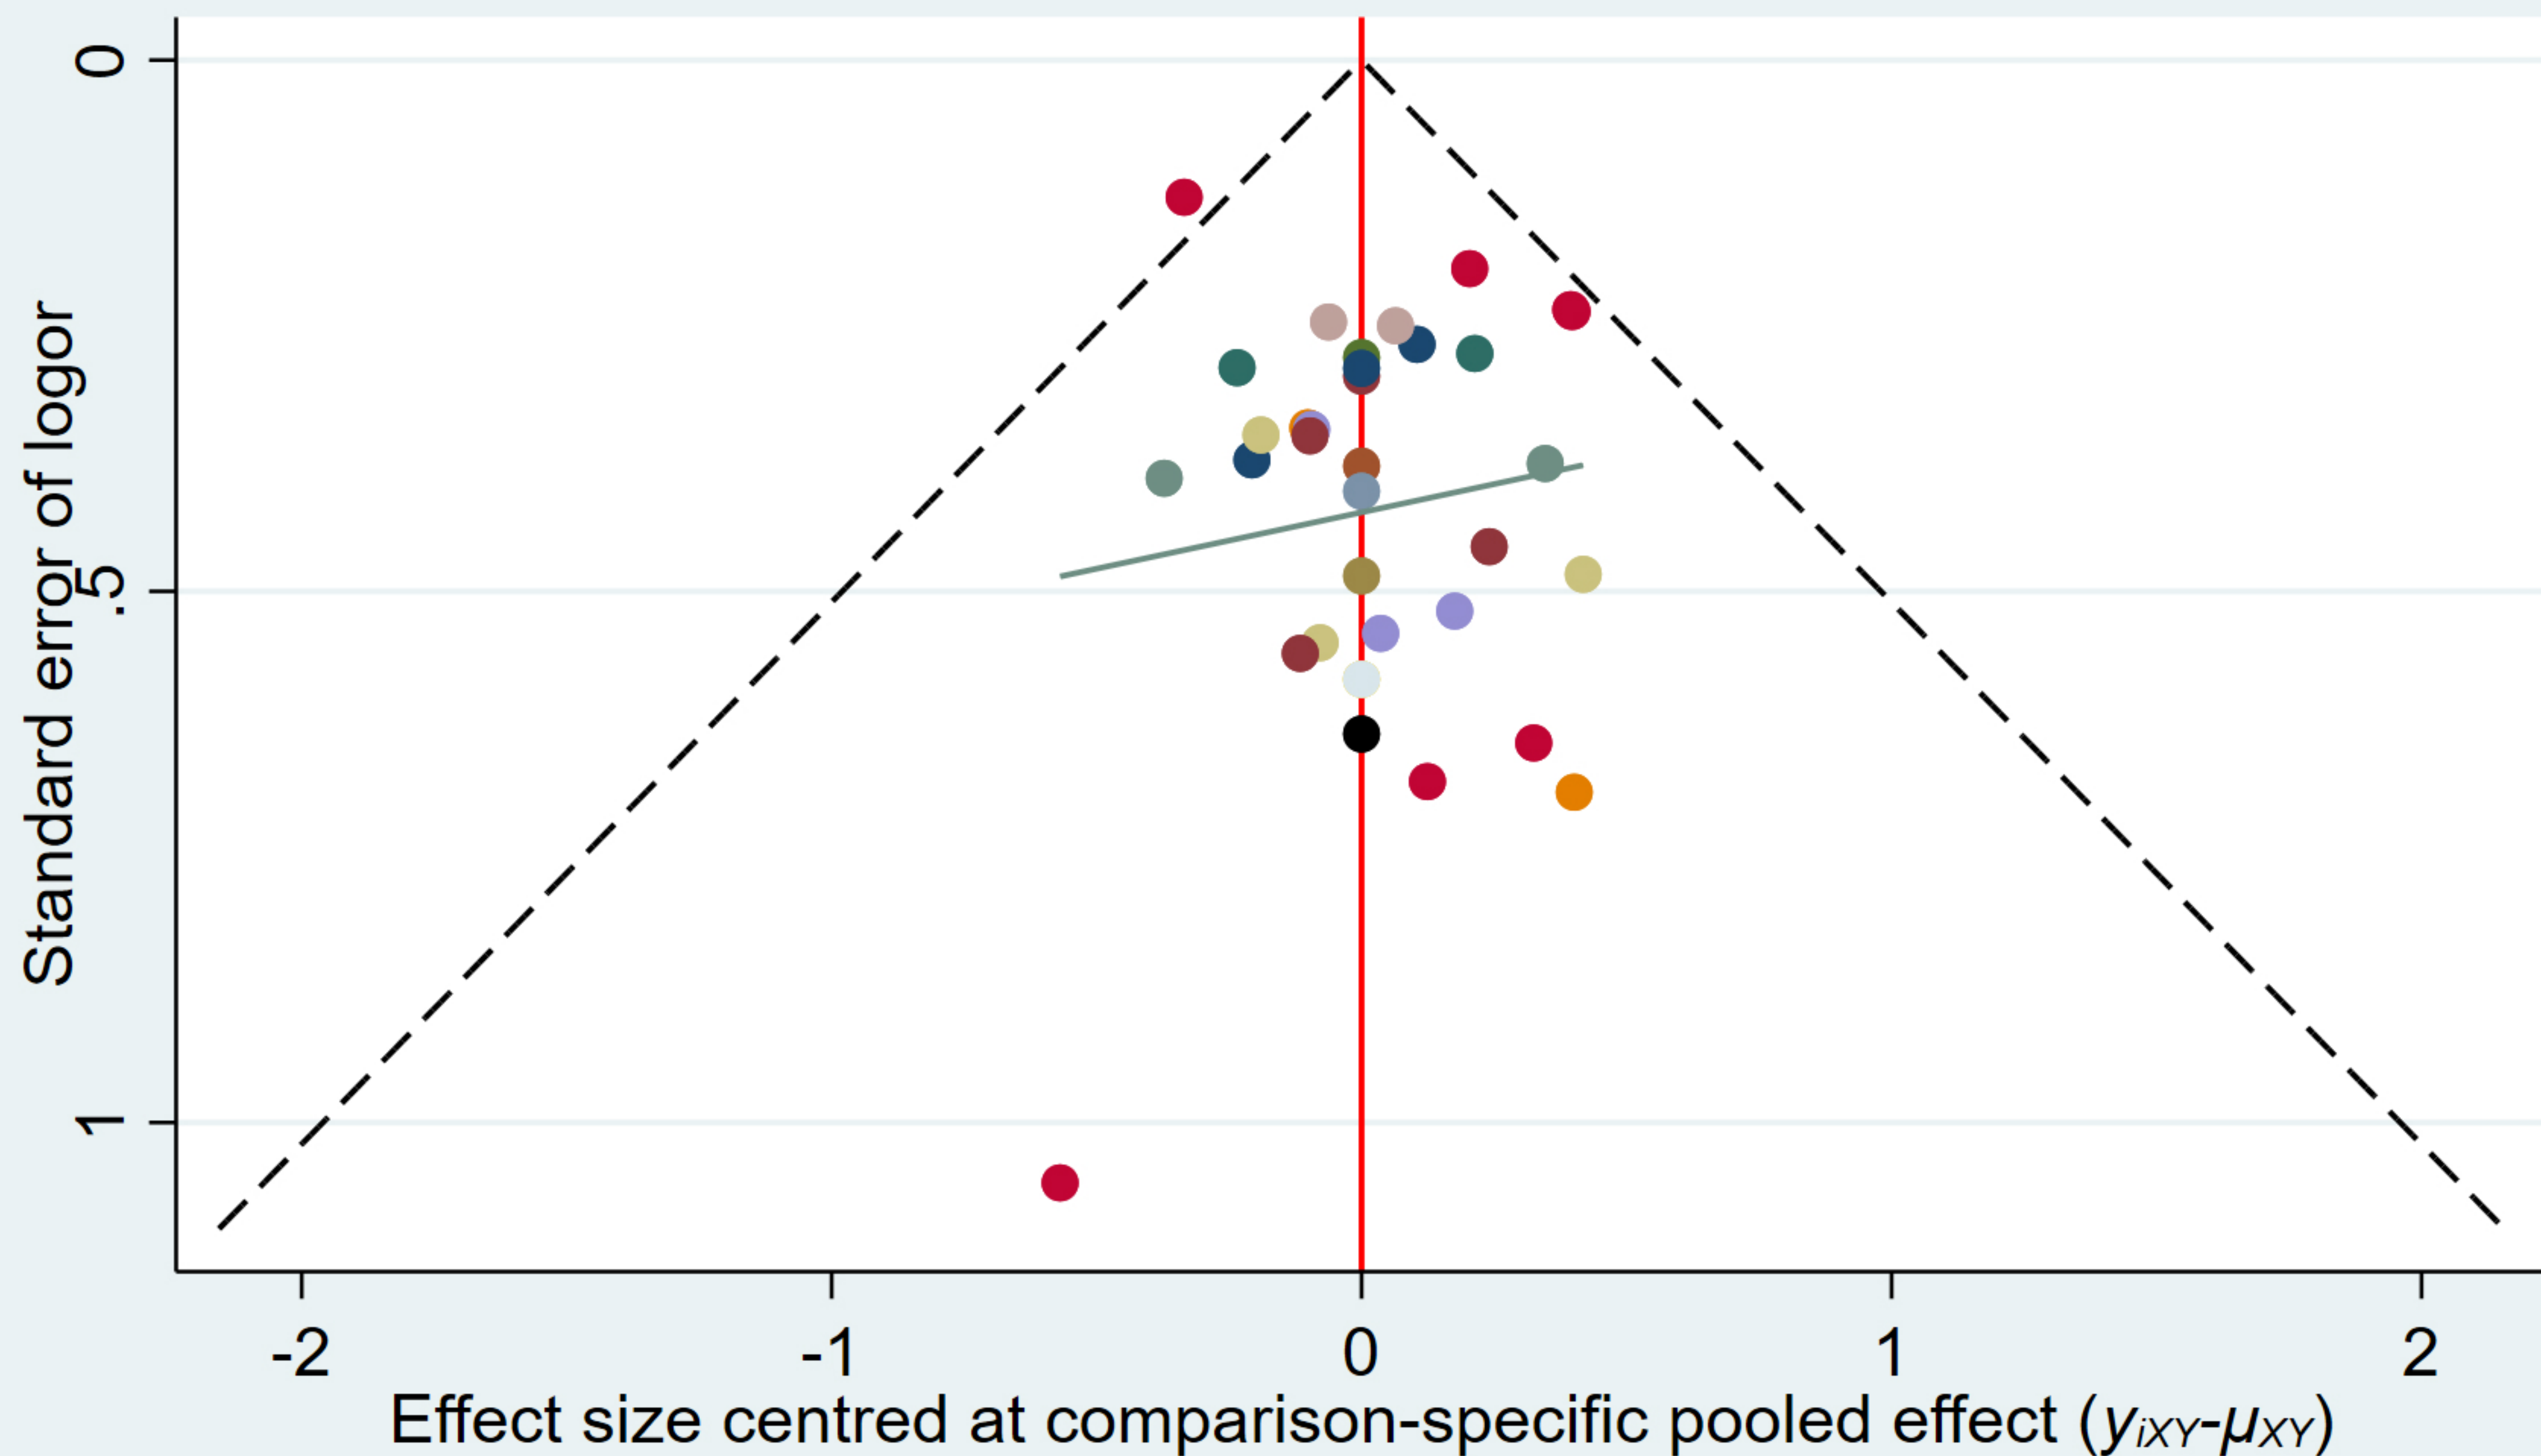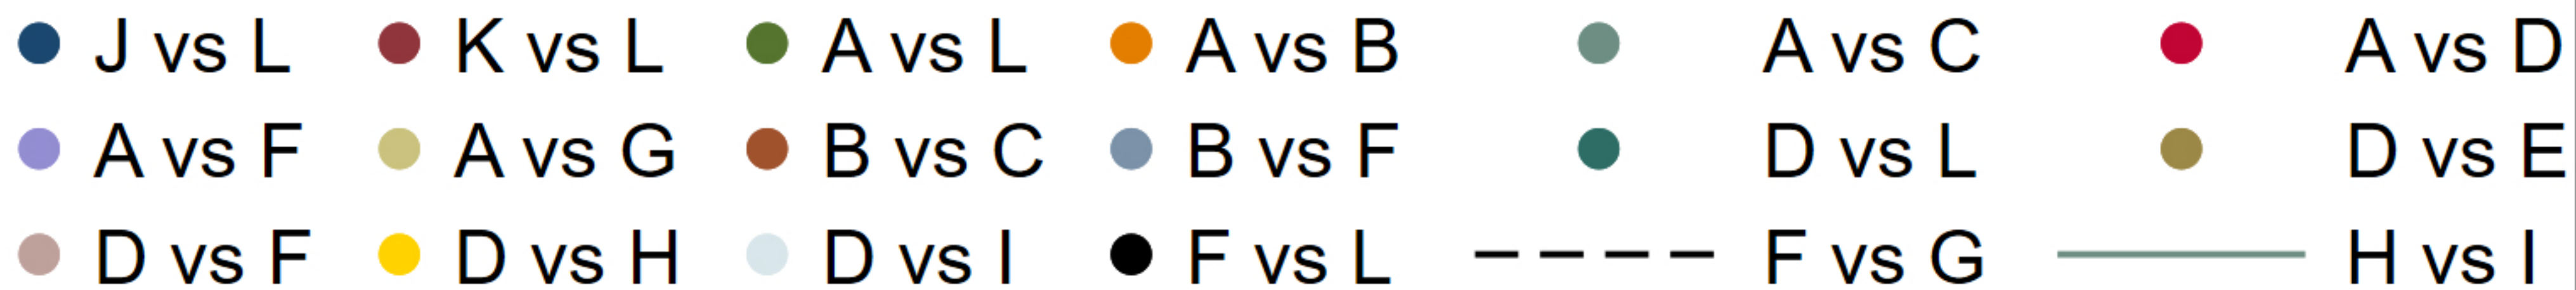

Supplement: f1 [file 3181427.f1.zip]

Cumulative Probabilities

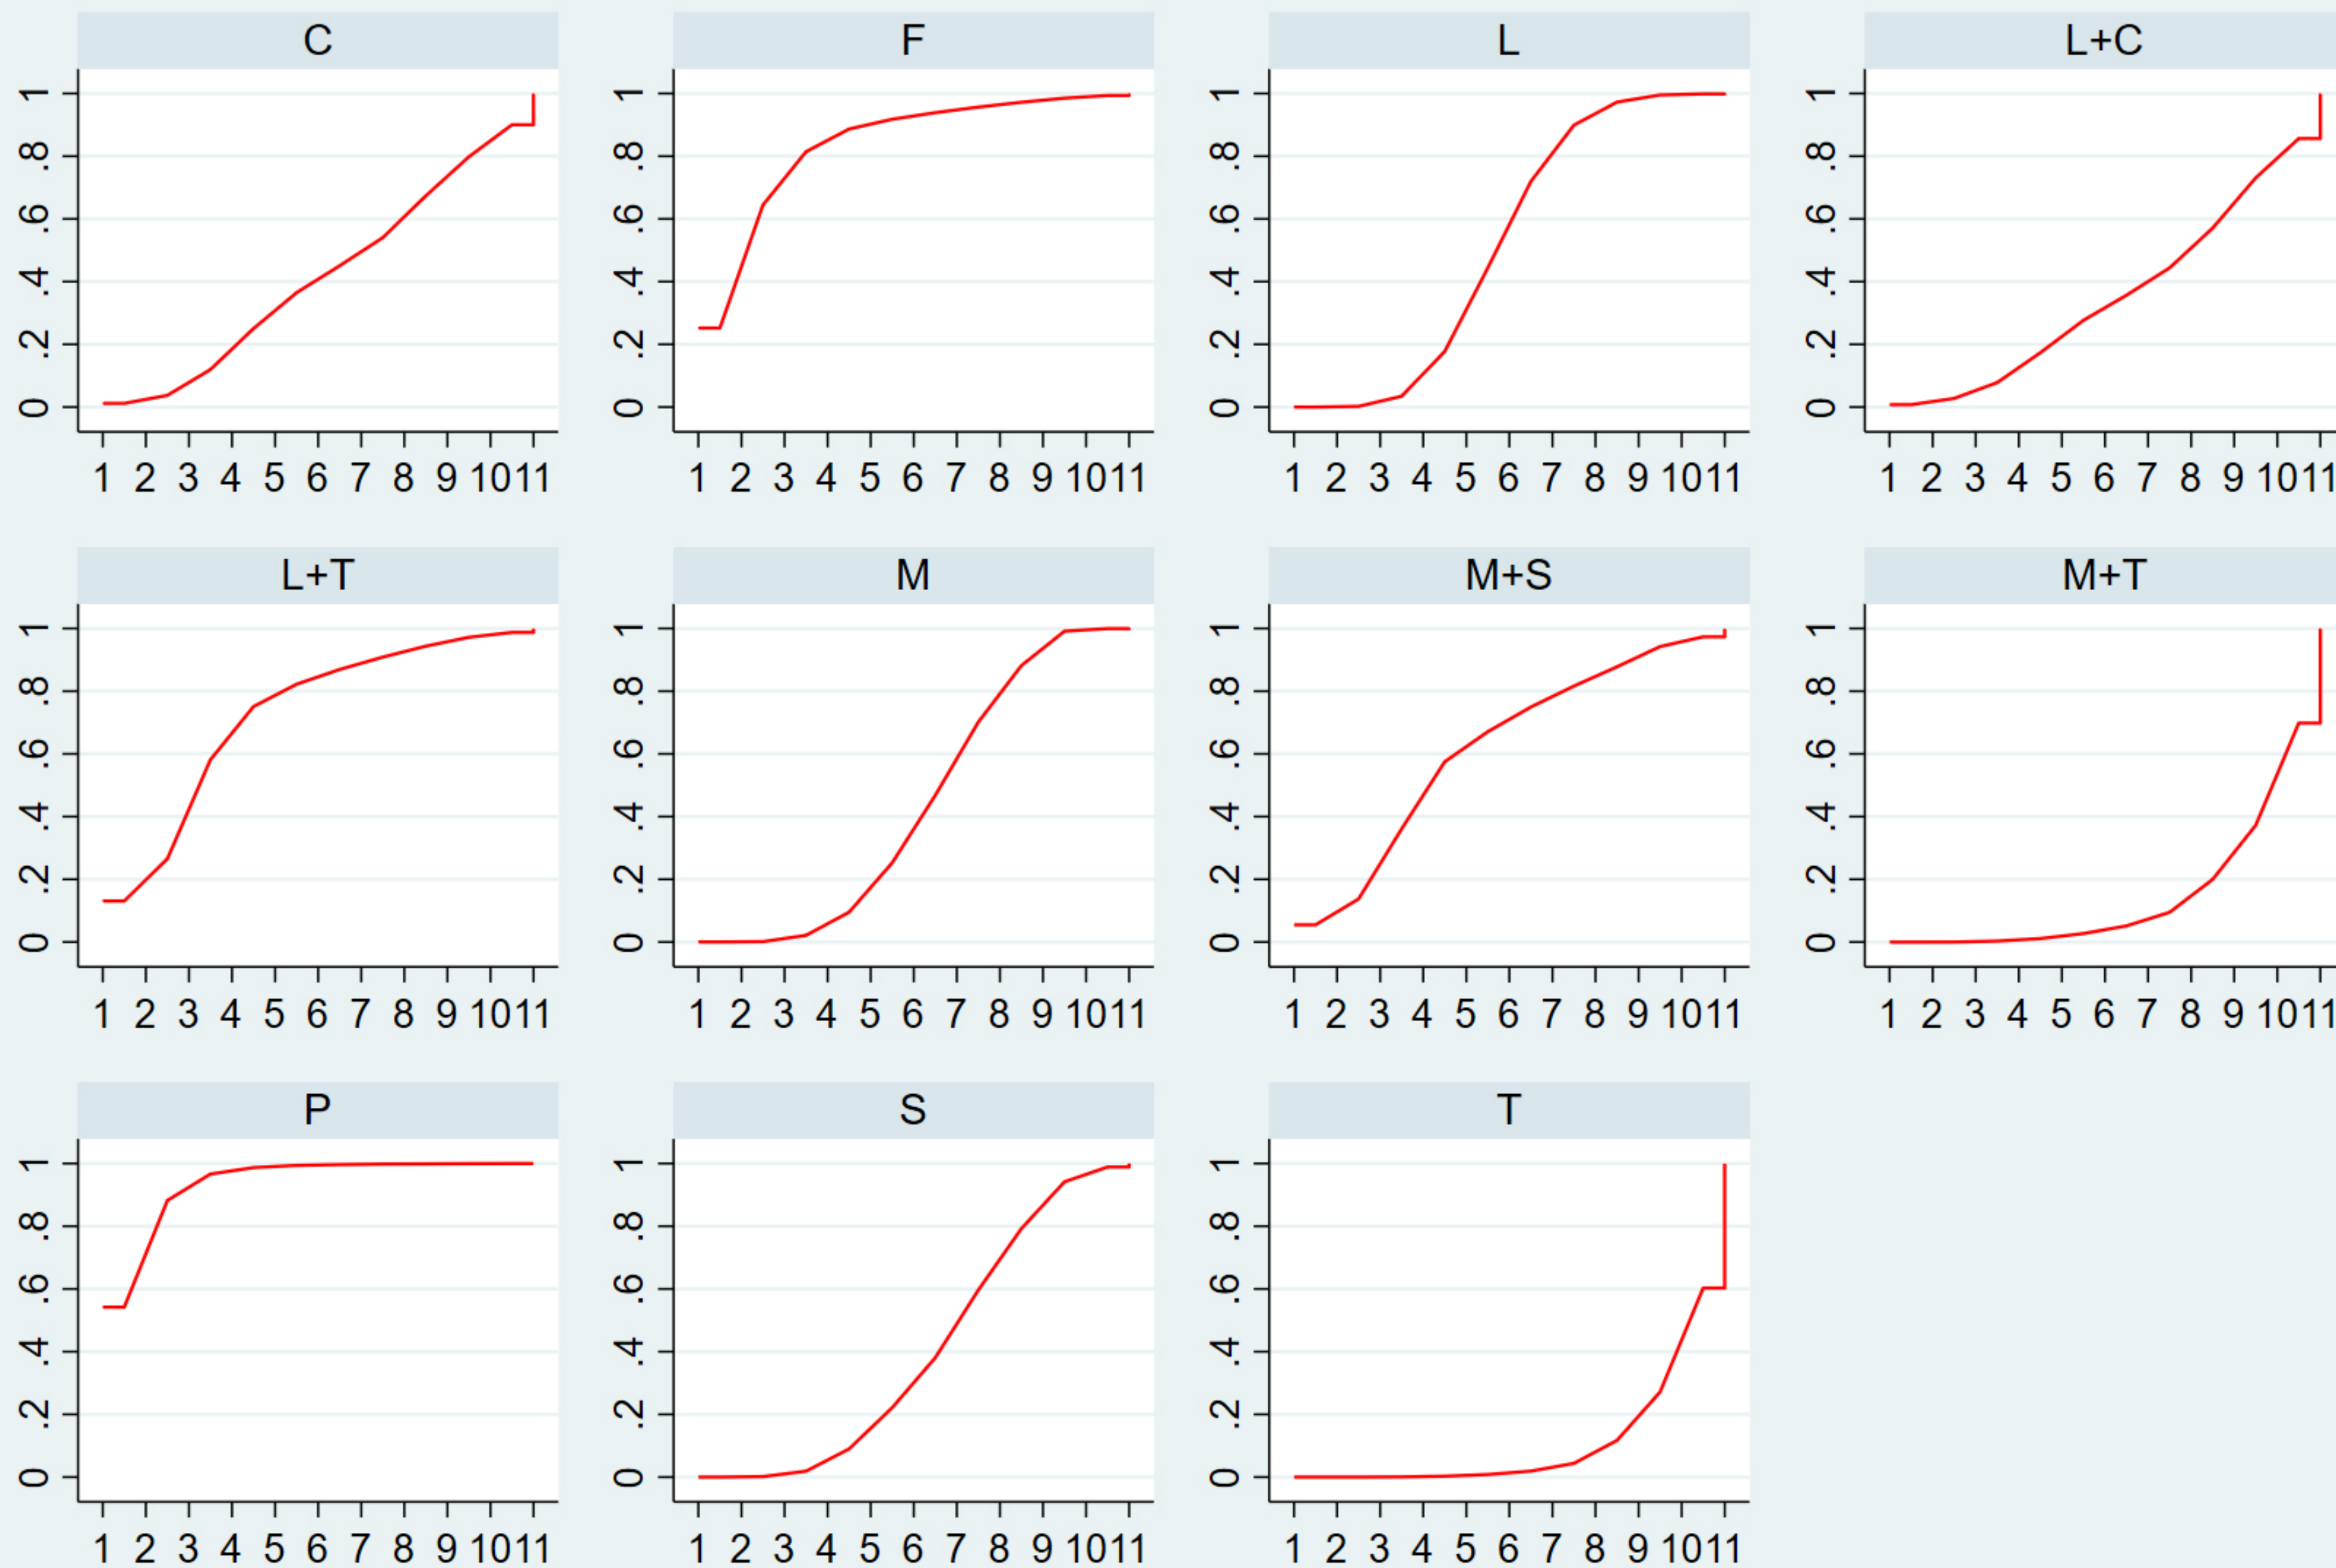

Rank

Graphs by Treatment

Supplement: f1 [file 3181427.f1.zip]
